# Supplementary material for: The BIG protein distinguishes the process of CO 2‐induced stomatal closure from the inhibition of stomatal opening by CO 2
Source: PubMed Central journal article supplement (PMC5887946; doi:10.1111/nph.14957), 2018-01-02
Supplement: NPH-218-232-s001.pdf [file NPH-218-232-s001.pdf]

## New Phytologist Supporting Information

Article title: **The BIG protein distinguishes the process of CO<sub>2</sub>-induced stomatal closure from the inhibition of stomatal opening by CO<sub>2</sub>.**

Authors: Jingjing He<sup>1, #</sup>, Ruo-Xi Zhang<sup>1, #</sup>, Kai Peng<sup>2</sup>, Cecilia Tagliavia<sup>3</sup>, Siwen Li<sup>1</sup>, Shaowu Xue<sup>4</sup>, Amy Liu<sup>5</sup>, Honghong Hu<sup>4, 5</sup>, Jingbo Zhang<sup>5</sup>, Katherine E Hubbard<sup>5, 6</sup>, Katrin Held<sup>7</sup>, Martin R McAinsh<sup>3</sup>, Julie E Gray<sup>8</sup>, Jörg Kudla<sup>7</sup>, Julian I Schroeder<sup>5</sup>, Yun-Kuan Liang<sup>1\* &</sup> and Alistair M Hetherington<sup>2\* &</sup>

Article acceptance date: 12 November 2017

The following Supporting Information is available for this article:

**Fig. S1** The *big-1* mutant fails to display elevated (800 ppm) CO<sub>2</sub>-induced reduction in stomatal conductance.

**Fig. S2** PCR amplification of the *BIG* fragment from cDNAs of WT and mutant plants.

**Fig. S3** Epidermal cell density of WT and *BIG* gene mutant seedlings grown at elevated 1,000 ppm [CO<sub>2</sub>].

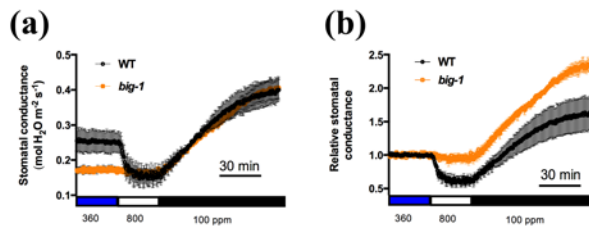

**Fig. S1** (a) In contrast to WT, the *big-1* mutant fails to display elevated (800 ppm) CO<sub>2</sub>-induced reduction in stomatal conductance, but exhibits a WT response when exposed to low (100 ppm) CO<sub>2</sub>. Error bars represent  $\pm$  SE (representative data, n=4). (b) Relative stomatal conductance in (a). Error bars represent  $\pm$  SE (representative data, n=4).

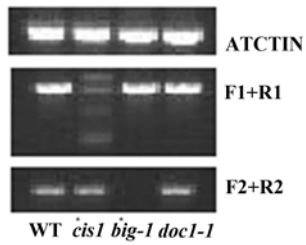

**Fig. S2** PCR amplification of the *BIG* fragment from cDNAs of WT and

mutant plants showed a complex PCR band pattern of *cis1* and only truncated *BIG* transcript present in *big-1* whereas no change in mRNA abundance is detected in the *doc1-1* mutant. Primer binding sites as indicated in Fig. 2a. *ACTIN* was used as a reference gene.

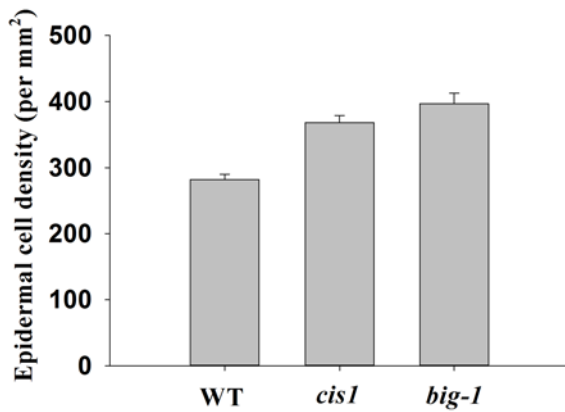

**Fig. S3** Epidermal cell density of WT and

*BIG* gene mutant seedlings grown at elevated 1,000 ppm [CO<sub>2</sub>].
