# Supplementary material for: The BIG protein distinguishes the process of CO 2‐induced stomatal closure from the inhibition of stomatal opening by CO 2
Source: PubMed Central journal article supplement (PMC5887946; doi:10.1111/nph.14957), 2018-01-02
Supplement: NPH-218-232-s002.pdf [file NPH-218-232-s002.pdf]

## New Phytologist Supporting Information

Article title: **The BIG protein distinguishes the process of CO<sub>2</sub>-induced stomatal closure from the inhibition of stomatal opening by CO<sub>2</sub>.**

Authors: Jingjing He<sup>1,#</sup>, Ruo-Xi Zhang<sup>1,#</sup>, Kai Peng<sup>2</sup>, Cecilia Tagliavia<sup>3</sup>, Siwen Li<sup>1</sup>, Shaowu Xue<sup>4</sup>, Amy Liu<sup>5</sup>, Honghong Hu<sup>4,5</sup>, Jingbo Zhang<sup>5</sup>, Katherine E Hubbard<sup>5,6</sup>, Katrin Held<sup>7</sup>, Martin R McAinsh<sup>3</sup>, Julie E Gray<sup>8</sup>, Jörg Kudla<sup>7</sup>, Julian I Schroeder<sup>5</sup>, Yun-Kuan Liang<sup>1\*</sup> and Alistair M Hetherington<sup>2\*</sup>

Article acceptance date: 12 November 2017

The following Supporting Information is available for this article:

### Notes S1: Determination of the intron-exon structure of *BIG* by DNA sequencing

#### 1. Summary

We managed by using 21 sets of primer pair together with each empirically optimized PCR condition to amplify and sequence through the cDNA of *BIG* (*At3g02260*) gene. Our result revealed that the actual length of the ORF of *BIG* is 15,234bp, which is 63bp shorter than the one predicted by Kanyuka *et al.* (2003). It is because a 30bp (GTACTGACTTGACACTGAATCAAGGTTTAG) of the sequence of intron 1, a 21 bp (GTAATGTTTCTACCAAATTCA) of intron 5 and a 12bp (GTGTGTTCTTGT) of intron 7 were interpreted as part of their respective neighboring exons by TAIR. Therefore the ORF of *BIG* gene is 15,234bp long encoding a putative peptide of 5,077 amino acids same to the length predicted by Gil *et al.* (2001).

#### 2. The intron-exon structure of *BIG* shown by the sequence alignment using CLUSTAL 2.1

BIG-GENOME is to refer to the genomic sequence of *BIG* gene downloaded from TAIR website;

BIG-ORF is the actual ORF of *BIG* determined by DNA sequencing;

BIG-TAIR is the ORF of *BIG* annotated by TAIR.

```
BIG-GENOME      ATGGCAGATGACTTGGCGAATCTCTGCCGATTCTCTTCGACGACACCGCCTTCCCTCT
BIG-ORF         ATGGCAGATGACTTGGCGAATCTCTGCCGATTCTCTTCGACGACACCGCCTTCCCTCT
BIG-TAIR        ATGGCAGATGACTTGGCGAATCTCTGCCGATTCTCTTCGACGACACCGCCTTCCCTCT
*****
BIG-GENOME      TTGTCGTCTTCGGCATCTTCAGATCTCTTTTCTCGCCGTTTACGCTCCGATGATTTCGATC
BIG-ORF         TTGTCGTCTTCGGCATCTTCAGATCTCTTTTCTCGCCGTTTACGCTCCGATGATTTCGATC
BIG-TAIR        TTGTCGTCTTCGGCATCTTCAGATCTCTTTTCTCGCCGTTTACGCTCCGATGATTTCGATC
*****
BIG-GENOME      AAGCGCGGTCTCCGTTCTTTCTATCTCCTCCTTCGCTGGGGTGTGCTCCGATCGGCGGA
BIG-ORF         AAGCGCGGTCTCCGTTCTTTCTATCTCCTCCTTCGCTGGGGTGTGCTCCGATCGGCGGA
BIG-TAIR        AAGCGCGGTCTCCGTTCTTTCTATCTCCTCCTTCGCTGGGGTGTGCTCCGATCGGCGGA
*****
BIG-GENOME      GACGATGCTGATTCTCTGGCAAGCTACGCTTTGAGACATGGTCCGATTTCGAGCTTCAA
BIG-ORF         GACGATGCTGATTCTCTGGCAAGCTACGCTTTGAGACATGGTCCGATTTCGAGCTTCAA
BIG-TAIR        GACGATGCTGATTCTCTGGCAAGCTACGCTTTGAGACATGGTCCGATTTCGAGCTTCAA
*****
```

|            |                                                                                      |
|------------|--------------------------------------------------------------------------------------|
| BIG-GENOME | GCTCTTGTTTCGATATCTCAGGCGATCCTTCTACTATCTCGATCTCTATTAG <b>G<b>TACTGAC</b></b>          |
| BIG-ORF    | GCTCTTGTTTCGATATCTCAGGCGATCCTTCTACTATCTCGATCTCTATTAG-----                            |
| BIG-TAIR   | GCTCTTGTTTCGATATCTCAGGCGATCCTTCTACTATCTCGATCTCTATTAG <b>G<b>TACTGAC</b></b><br>***** |
| BIG-GENOME | <b>TTGACTGAATCAAGGTTAG</b> GTCGGTATCAATTAGCTGCCATTCTAGTTCGTCTT                       |
| BIG-ORF    | -----                                                                                |
| BIG-TAIR   | <b>TTGACTGAATCAAGGTTAG</b> -----                                                     |
| BIG-GENOME | CCACTTCTGAGCTTTGGCATCTGCTTTTTTTGTTGCTATCCTAGATGAGTACTAGTTA                           |
| BIG-ORF    | -----                                                                                |
| BIG-TAIR   | -----                                                                                |
| BIG-GENOME | TTTCCATCTGAACAGTGATGATCTCGAATCATTTCCTTACTGTTTTTTTTTTTGGT                             |
| BIG-ORF    | -----                                                                                |
| BIG-TAIR   | -----                                                                                |
| BIG-GENOME | GTATCTTAGTGGACCAACTCGAACCAATCGTTTTGGGTGTCATCCAGGAGGTGATGGAAT                         |
| BIG-ORF    | -----TGGACCAACTCGAACCAATCGTTTTGGGTGTCATCCAGGAGGTGATGGAAT                             |
| BIG-TAIR   | -----TGGACCAACTCGAACCAATCGTTTTGGGTGTCATCCAGGAGGTGATGGAAT<br>*****                    |
| BIG-GENOME | TCTCTCTCAGCTTCTGGAGAAGTCAAGTTTGTAGACAAAATGATCTCAAAATGGAGGTTT                         |
| BIG-ORF    | TCTCTCTCAGCTTCTGGAGAAGTCAAGTTTGTAGACAAAATGATCTCAAAATGGAG----                         |
| BIG-TAIR   | TCTCTCTCAGCTTCTGGAGAAGTCAAGTTTGTAGACAAAATGATCTCAAAATGGAG----<br>*****                |
| BIG-GENOME | GTTCTTTATTATTAATTGTGATAGAGATTCAGTAGGGAAGTCTTAAATGTTGGTCTTAT                          |
| BIG-ORF    | -----                                                                                |
| BIG-TAIR   | -----                                                                                |
| BIG-GENOME | TTTGGTACACTGGGTAACTAGGTAATCTGCTTGAGGTCCTTTTGGAGCATAGACATAT                           |
| BIG-ORF    | -----                                                                                |
| BIG-TAIR   | -----                                                                                |
| BIG-GENOME | CTTCTAGAGAATTTGTTTTTATTTGTGTTGTTTTTCGATGATTAGACGTTTGAACCTCGT                         |
| BIG-ORF    | -----                                                                                |
| BIG-TAIR   | -----                                                                                |
| BIG-GENOME | TTTATAAGACTTTATCAGGTTTTTGACTAGTGGTCAGGTTTCATTGTTGCGCCATAG                            |
| BIG-ORF    | -----                                                                                |
| BIG-TAIR   | -----                                                                                |
| BIG-GENOME | AATTTTGCACATATGCTAACCAGCATGTTTTTCGTTTTACCTTTTCCATGAGGGTTATAG                         |
| BIG-ORF    | -----                                                                                |
| BIG-TAIR   | -----                                                                                |

```

BIG-GENOME      TATGGTTACGGTCTACTTCCATTAGTAACTCTTTGTCTATCACCAAAACATTTGTGGACT
BIG-ORF         -----
BIG-TAIR        -----

BIG-GENOME      ACTGACTTGGTTTCTTACTCTGTTTCTATCAAGTTGACTGCATTAGTAATATCTCCAAA
BIG-ORF         -----
BIG-TAIR        -----

BIG-GENOME      TGCTTGCTTGAATCAGATCAACATGGAAATACTTTTGGAAATTGCTTCTTTTGTGGAAG
BIG-ORF         -----ATCAACATGGAAATACTTTTGGAAATTGCTTCTTTTGTGGAAG
BIG-TAIR        -----ATCAACATGGAAATACTTTTGGAAATTGCTTCTTTTGTGGAAG
                *****

BIG-GENOME      TGAGAAGCAATATGATATATTACCAGATTTCTCTCCCGTGAAGTTGCAGAAGTGTGGCC
BIG-ORF         TGAGAAGCAATATGATATATTACCAGATTTCTCTCCCGTGAAGTTGCAGAAGTGTGGCC
BIG-TAIR        TGAGAAGCAATATGATATATTACCAGATTTCTCTCCCGTGAAGTTGCAGAAGTGTGGCC
                *****

BIG-GENOME      AGCTTTTCTGGCGAGCATGATAATATGGACGCACAGAGCCTTGTGAAATGTACTTTTCA
BIG-ORF         AGCTTTTCTGGCGAGCATGATAATATGGACGCACAGAGCCTTGTGAAATGTACTTTTCA
BIG-TAIR        AGCTTTTCTGGCGAGCATGATAATATGGACGCACAGAGCCTTGTGAAATGTACTTTTCA
                *****

BIG-GENOME      AGGTATTGTTTCTACCCATCCACTCAGCAATATGTTTCTTACTTCAAATTTATTTGATG
BIG-ORF         AG-----
BIG-TAIR        AG-----
                **

BIG-GENOME      ACCCTTACATCTTTTGACATCTCAAGCAGGGGCGAGTGCTCAAATGAAGAGAAGCCAGT
BIG-ORF         -----GGGCAGATGCTCAAATGAAGAGAAGCCAGT
BIG-TAIR        -----GGGCAGATGCTCAAATGAAGAGAAGCCAGT
                *****

BIG-GENOME      TGACCGGCTTCTTATTACACTGATGTCTGAATGCATTGAATCTGATGTCCAGGCGCAGTC
BIG-ORF         TGACCGGCTTCTTATTACACTGATGTCTGAATGCATTGAATCTGATGTCCAGGCGCAGTC
BIG-TAIR        TGACCGGCTTCTTATTACACTGATGTCTGAATGCATTGAATCTGATGTCCAGGCGCAGTC
                *****

BIG-GENOME      AGTAGTAAAGTCCCCTTTTCAACAAGACTGTGGAGACCTGAATCCCTTTACTCGACACCT
BIG-ORF         AGTAGTAAAGTCCCCTTTTCAACAAGACTGTGGAGACCTGAATCCCTTTACTCGACACCT
BIG-TAIR        AGTAGTAAAGTCCCCTTTTCAACAAGACTGTGGAGACCTGAATCCCTTTACTCGACACCT
                *****

BIG-GENOME      GGCAGTTGTTACCTTCGCTGTGTTTGTGCGCTGATTATGGTCTGCAAAGAGCTTGTTC
BIG-ORF         GGCAGTTGTTACCTTCGCTGTGTTTGTGCGCTGATTATGGTCTGCAAAGAGCTTGTTC
BIG-TAIR        GGCAGTTGTTACCTTCGCTGTGTTTGTGCGCTGATTATGGTCTGCAAAGAGCTTGTTC
                *****

BIG-GENOME      ATTGCCAAATATGTTGGATGAGAAGACGGTTGATCAAGCTGCCTTGATAAATTGTCGTT
BIG-ORF         ATTGCCAAATATGTTGGATGAGAAGACGGTTGATCAAGCTGCCTTGATAAATTGTCGTT
BIG-TAIR        ATTGCCAAATATGTTGGATGAGAAGACGGTTGATCAAGCTGCCTTGATAAATTGTCGTT
                *****

```

BIG-GENOME CTGCTTAAGAATTTTGAAGCTGCTTGGGAGTCTTTCAAAAGATGTTCAAAGTATAGAAAA  
BIG-ORF CTGCTTAAGAATTTTGAAGCTGCTTGGGAGTCTTTCAAAAGATGTTCAAAGTATAGAAAA  
BIG-TAIR CTGCTTAAGAATTTTGAAGCTGCTTGGGAGTCTTTCAAAAGATGTTCAAAGTATAGAAAA  
\*\*\*\*\*  
BIG-GENOME CGACGGCTCATTGTTACAAGCAGTAGCTTCATTTACAGATGCTTTTCCTAAGCTGTTTAG  
BIG-ORF CGACGGCTCATTGTTACAAGCAGTAGCTTCATTTACAGATGCTTTTCCTAAGCTGTTTAG  
BIG-TAIR CGACGGCTCATTGTTACAAGCAGTAGCTTCATTTACAGATGCTTTTCCTAAGCTGTTTAG  
\*\*\*\*\*  
BIG-GENOME GGTTTTCTTTGAATTCACTAACCACACTGCTACAGAGGTAATATTGAGAGTCTTCTCT  
BIG-ORF GGTTTTCTTTGAATTCACTAACCACACTGCTACAGAGGTAATATTGAGAGTCTTCTCT  
BIG-TAIR GGTTTTCTTTGAATTCACTAACCACACTGCTACAGAGGTAATATTGAGAGTCTTCTCT  
\*\*\*\*\*  
BIG-GENOME TGCCTAGTGGAGGGATTCTTAATCTCGTCCAACCTCATTTTGGCAAGAGCAGTGT  
BIG-ORF TGCCTAGTGGAGGGATTCTTAATCTCGTCCAACCTCATTTTGGCAAGAGCAGTGT  
BIG-TAIR TGCCTAGTGGAGGGATTCTTAATCTCGTCCAACCTCATTTTGGCAAGAGCAGTGT  
\*\*\*\*\*  
BIG-GENOME TCAGAAATGCCAGCATGTGTGGCAGCTTCTATTGTCAGCAATCTAGATTCCTCAGTGTG  
BIG-ORF TCAGAAATGCCAGCATGTGTGGCAGCTTCTATTGTCAGCAATCTAGATTCCTCAGTGTG  
BIG-TAIR TCAGAAATGCCAGCATGTGTGGCAGCTTCTATTGTCAGCAATCTAGATTCCTCAGTGTG  
\*\*\*\*\*  
BIG-GENOME GAGATATGATGGGTCCTTGTAAATTTGACACCTCCACTTGCTTACTCCCTCGGTCTGT  
BIG-ORF GAGATATGATGGGTCCTTGTAAATTTGACACCTCCACTTGCTTACTCCCTCGGTCTGT  
BIG-TAIR GAGATATGATGGGTCCTTGTAAATTTGACACCTCCACTTGCTTACTCCCTCGGTCTGT  
\*\*\*\*\*  
BIG-GENOME CATCTACACATTGAAACTCATTCAAGATCTCAAGAGACAACCATACCATATCCATGATCT  
BIG-ORF CATCTACACATTGAAACTCATTCAAGATCTCAAGAGACAACCATACCATATCCATGATCT  
BIG-TAIR CATCTACACATTGAAACTCATTCAAGATCTCAAGAGACAACCATACCATATCCATGATCT  
\*\*\*\*\*  
BIG-GENOME GAGGGTTTTAGAGTCTGAAGTTACCTATGAAGATGTCAGTCCACTGTTGATTCTGTTA  
BIG-ORF GAGGGTTTTAGAGTCTGAAGTTACCTATGAAGATGTCAGTCCACTGTTGATTCTGTTA  
BIG-TAIR GAGGGTTTTAGAGTCTGAAGTTACCTATGAAGATGTCAGTCCACTGTTGATTCTGTTA  
\*\*\*\*\*  
BIG-GENOME TTTCCATCTGCGCCAGGAAAAGATCCCGTTGCTCAAGTGCTTCACGGTCGAGGATATAAT  
BIG-ORF TTTCCATCTGCGCCAGGAAAAGATCCCGTTGCTCAAGTGCTTCACGGTCGAGGATATAAT  
BIG-TAIR TTTCCATCTGCGCCAGGAAAAGATCCCGTTGCTCAAGTGCTTCACGGTCGAGGATATAAT  
\*\*\*\*\*  
BIG-GENOME GAGAGTGATATTTCCCTCATCAAGTCAATGGATGGATAACTTCTCCATCTGTTTATTT  
BIG-ORF GAGAGTGATATTTCCCTCATCAAGTCAATGGATGGATAACTTCTCCATCTGTTTATTT  
BIG-TAIR GAGAGTGATATTTCCCTCATCAAGTCAATGGATGGATAACTTCTCCATCTGTTTATTT  
\*\*\*\*\*  
BIG-GENOME CCTCCATCGCGAAGGTGTAATAATTACGACCAAAAAGTGGAGAGGACGTATTCCAGTTAAG  
BIG-ORF CCTCCATCGCGAAGGTGTAATAATTACGACCAAAAAGTGGAGAGGACGTATTCCAGTTAAG  
BIG-TAIR CCTCCATCGCGAAGGTGTAATAATTACGACCAAAAAGTGGAGAGGACGTATTCCAGTTAAG

```
*****
BIG-GENOME ATCCAACAGTTTGCAGAAGTTGAAAGCCAAATTTCTCATGACGATGAAGCCCTGTTTGG
BIG-ORF ATCCAACAGTTTGCAGAAGTTGAAAGCCAAATTTCTCATGACGATGAAGCCCTGTTTGG
BIG-TAIR ATCCAACAGTTTGCAGAAGTTGAAAGCCAAATTTCTCATGACGATGAAGCCCTGTTTGG
*****
BIG-GENOME AAAC TTATTTCTGAGGGTAGTCGTTCTCTCTGTTCCATAGAACCAAATGATCAACCACC
BIG-ORF AAAC TTATTTCTGAGGGTAGTCGTTCTCTCTGTTCCATAGAACCAAATGATCAACCACC
BIG-TAIR AAAC TTATTTCTGAGGGTAGTCGTTCTCTCTGTTCCATAGAACCAAATGATCAACCACC
*****
BIG-GENOME TGT TTTCTGTCAGCAGCAATTTACTATTGCAAGCTGCTAAGGAAGCTGTTGAATTTTCTTAG
BIG-ORF TGT TTTCTGTCAGCAGCAATTTACTATTGCAAGCTGCTAAGGAAGCTGTTGAATTTTCTTAG
BIG-TAIR TGT TTTCTGTCAGCAGCAATTTACTATTGCAAGCTGCTAAGGAAGCTGTTGAATTTTCTTAG
*****
BIG-GENOME AGCATGCATTCTTTGTCAAGAATGGGTTCTAGTATATATGAAGATGGATGTA AAAAGCT
BIG-ORF AGCATGCATTCTTTGTCAAGAATGGGTTCTAGTATATATGAAGATGGATGTA AAAAGCT
BIG-TAIR AGCATGCATTCTTTGTCAAGAATGGGTTCTAGTATATATGAAGATGGATGTA AAAAGCT
*****
BIG-GENOME TGACACTGGTCACATTGATATCCTGCTCAATATAGTAGGCTGTAGTATTGAAGACAAGGC
BIG-ORF TGACACTGGTCACATTGATATCCTGCTCAATATAGTAGGCTGTAGTATTGAAGACAAGGC
BIG-TAIR TGACACTGGTCACATTGATATCCTGCTCAATATAGTAGGCTGTAGTATTGAAGACAAGGC
*****
BIG-GENOME TTCTGATGGTGGTTGCATGCTCCAAGATGAGGGAAGACCTGGACATGTTGCTTTTGAGCT
BIG-ORF TTCTGATGGTGGTTGCATGCTCCAAGATGAGGGAAGACCTGGACATGTTGCTTTTGAGCT
BIG-TAIR TTCTGATGGTGGTTGCATGCTCCAAGATGAGGGAAGACCTGGACATGTTGCTTTTGAGCT
*****
BIG-GENOME GTTACTCAATCTCTTGAGAAGTCGTGCTCTGCTGATTTTCTAGAGTCTACCTTTTCA
BIG-ORF GTTACTCAATCTCTTGAGAAGTCGTGCTCTGCTGATTTTCTAGAGTCTACCTTTTCA
BIG-TAIR GTTACTCAATCTCTTGAGAAGTCGTGCTCTGCTGATTTTCTAGAGTCTACCTTTTCA
*****
BIG-GENOME GCAAATCTTGTTGTTGAAAATAGTGACTTCAACTATAATGATAAGACTCTGGCACTGTT
BIG-ORF GCAAATCTTGTTGTTGAAAATAGTGACTTCAACTATAATGATAAGACTCTGGCACTGTT
BIG-TAIR GCAAATCTTGTTGTTGAAAATAGTGACTTCAACTATAATGATAAGACTCTGGCACTGTT
*****
BIG-GENOME GGCTCACACTCTTCTATGTAGGCCGGGCTTGGCTGGGGCACAGTTGAGAGCCAAAATTTA
BIG-ORF GGCTCACACTCTTCTATGTAGGCCGGGCTTGGCTGGGGCACAGTTGAGAGCCAAAATTTA
BIG-TAIR GGCTCACACTCTTCTATGTAGGCCGGGCTTGGCTGGGGCACAGTTGAGAGCCAAAATTTA
*****
BIG-GENOME TGATGGTTTCGTTAGTTTTGTTACCGAGAGAGCAAGAGGTATATGTGCTGAAGCTTTGAG
BIG-ORF TGATGGTTTCGTTAGTTTTGTTACCGAGAGAGCAAGAGGTATATGTGCTGAAGCTTTGAG
BIG-TAIR TGATGGTTTCGTTAGTTTTGTTACCGAGAGAGCAAGAGGTATATGTGCTGAAGCTTTGAG
*****
BIG-GENOME TCTCAAGGAGTTGACTGCTTGCTTCTCTGCTTCCATATTGAGATTCTTCTTATGGC
BIG-ORF TCTCAAGGAGTTGACTGCTTGCTTCTCTGCTTCCATATTGAGATTCTTCTTATGGC
BIG-TAIR TCTCAAGGAGTTGACTGCTTGCTTCTCTGCTTCCATATTGAGATTCTTCTTATGGC
```

```
*****
BIG-GENOME TTTCCATTTATCAAATGAAGCTGAGAAGGCAAAATTCCAAATCTCATTGCTTCATGTCT
BIG-ORF TTTCCATTTATCAAATGAAGCTGAGAAGGCAAAATTCCAAATCTCATTGCTTCATGTCT
BIG-TAIR TTTCCATTTATCAAATGAAGCTGAGAAGGCAAAATTCCAAATCTCATTGCTTCATGTCT
*****
BIG-GENOME GCATAAAGTTGATACCCCGCAGGAATATGTGATGGTCTCAGCTGCCTCTTGGGCAAT
BIG-ORF GCATAAAGTTGATACCCCGCAGGAATATGTGATGGTCTCAGCTGCCTCTTGGGCAAT
BIG-TAIR GCATAAAGTTGATACCCCGCAGGAATATGTGATGGTCTCAGCTGCCTCTTGGGCAAT
*****
BIG-GENOME GCTGATATCTAGGTTGTTAGTGCTGTTGCACCATATGTTGTTACATCCAAACACATGCC
BIG-ORF GCTGATATCTAGGTTGTTAGTGCTGTTGCACCATATGTTGTTACATCCAAACACATGCC
BIG-TAIR GCTGATATCTAGGTTGTTAGTGCTGTTGCACCATATGTTGTTACATCCAAACACATGCC
*****
BIG-GENOME AACATCATTAAATGCTAGATCTAAGGCTAAACTGAGGGAAGTTCGTAGCTGTGGTAGTAA
BIG-ORF AACATCATTAAATGCTAGATCTAAGGCTAAACTGAGGGAAGTTCGTAGCTGTGGTAGTAA
BIG-TAIR AACATCATTAAATGCTAGATCTAAGGCTAAACTGAGGGAAGTTCGTAGCTGTGGTAGTAA
*****
BIG-GENOME TTTACATGTAAGTGTGGTATCATTATCTTCGTGGGCGTCTCTGTAGCAAGGGGAT
BIG-ORF TTTACATGTAAGTGTGGTATCATTATCTTCGTGGGCGTCTCTGTAGCAAGGGGAT
BIG-TAIR TTTACATGTAAGTGTGGTATCATTATCTTCGTGGGCGTCTCTGTAGCAAGGGGAT
*****
BIG-GENOME AACTGATTCATGGGCTGAGGATGAGTCAGTCAGCCATCTAATGAGTCAAATGATTGACTT
BIG-ORF AACTGATTCATGGGCTGAGGATGAGTCAGTCAGCCATCTAATGAGTCAAATGATTGACTT
BIG-TAIR AACTGATTCATGGGCTGAGGATGAGTCAGTCAGCCATCTAATGAGTCAAATGATTGACTT
*****
BIG-GENOME TTCCCCTCATCCTCTACATTTCAGAAATGATGTGCTACTGCCAAAACCTTAAACTGGA
BIG-ORF TTCCCCTCATCCTCTACATTTCAGAAATGATGTGCTACTGCCAAAACCTTAAACTGGA
BIG-TAIR TTCCCCTCATCCTCTACATTTCAGAAATGATGTGCTACTGCCAAAACCTTAAACTGGA
*****
BIG-GENOME TTATGGAGATTTATCTGCGAGTTTGTCGGGTTTGGGGCTGTGGAAGGGGAAAAAGGC
BIG-ORF TTATGGAGATTTATCTGCGAGTTTGTCGGGTTTGGGGCTGTGGAAGGGGAAAAAGGC
BIG-TAIR TTATGGAGATTTATCTGCGAGTTTGTCGGGTTTGGGGCTGTGGAAGGGGAAAAAGGC
*****
BIG-GENOME AGGAAAAGTGAAGACCTGCTAGTGAAAGATACATTTTCATGCTTCTTCAGATATTGC
BIG-ORF AGGAAAAGTGAAGACCTGCTAGTGAAAGATACATTTTCATGCTTCTTCAGATATTGC
BIG-TAIR AGGAAAAGTGAAGACCTGCTAGTGAAAGATACATTTTCATGCTTCTTCAGATATTGC
*****
BIG-GENOME TCGTATTAACCTGTGCATTGGATAGCCAGCCTCTTTGCATGTTAATTACCAGAATGTGGA
BIG-ORF TCGTATTAACCTGTGCATTGGATAGCCAGCCTCTTTGCATGTTAATTACCAGAATGTGGA
BIG-TAIR TCGTATTAACCTGTGCATTGGATAGCCAGCCTCTTTGCATGTTAATTACCAGAATGTGGA
*****
BIG-GENOME CATATCTAACTCTGTGGATCTCATCAGCACCAGTCATTGCTTGTAGGCGACATCAATGT
BIG-ORF CATATCTAACTCTGTGGATCTCATCAGCACCAGTCATTGCTTGTAGGCGACATCAATGT
BIG-TAIR CATATCTAACTCTGTGGATCTCATCAGCACCAGTCATTGCTTGTAGGCGACATCAATGT
```

```
*****
BIG-GENOME      TGTTGGTAGAAATATCGAGTTGAGAAACATTCTGATCGGTGTTTAAATCAGCTCCAGGC
BIG-ORF         TGTTGGTAGAAATATCGAGTTGAGAAACATTCTGATCGGTGTTTAAATCAGCTCCAGGC
BIG-TAIR        TGTTGGTAGAAATATCGAGTTGAGAAACATTCTGATCGGTGTTTAAATCAGCTCCAGGC
*****
BIG-GENOME      AGCACCTGAGCAGGTGGTTGAGGATTGGGTTGGGATTATATTCGCGAAGGAGCTTGGCT
BIG-ORF         AGCACCTGAGCAGGTGGTTGAGGATTGGGTTGGGATTATATTCGCGAAGGAGCTTGGCT
BIG-TAIR        AGCACCTGAGCAGGTGGTTGAGGATTGGGTTGGGATTATATTCGCGAAGGAGCTTGGCT
*****
BIG-GENOME      CTCTCTTCTGTTGACTTTCTTGATGGTGGCGTCTGGGATTATTGCAACAAAAATTCATG
BIG-ORF         CTCTCTTCTGTTGACTTTCTTGATGGTGGCGTCTGGGATTATTGCAACAAAAATTCATG
BIG-TAIR        CTCTCTTCTGTTGACTTTCTTGATGGTGGCGTCTGGGATTATTGCAACAAAAATTCATG
*****
BIG-GENOME      TTCAGAAATCGATCCCTTCTGGAAGGAGTGCACATCTGTTGACGCCAAGTATGTTGCTGC
BIG-ORF         TTCAGAAATCGATCCCTTCTGGAAGGAGTGCACATCTGTTGACGCCAAGTATGTTGCTGC
BIG-TAIR        TTCAGAAATCGATCCCTTCTGGAAGGAGTGCACATCTGTTGACGCCAAGTATGTTGCTGC
*****
BIG-GENOME      AGCAGAAGGGGTAGTCTCTTACTTGATGAAGACTGGTGATATTGCAGAATTGCTGAGAAT
BIG-ORF         AGCAGAAGGGGTAGTCTCTTACTTGATGAAGACTGGTGATATTGCAGAATTGCTGAGAAT
BIG-TAIR        AGCAGAAGGGGTAGTCTCTTACTTGATGAAGACTGGTGATATTGCAGAATTGCTGAGAAT
*****
BIG-GENOME      GCTTTCATCATTGGTTGGCAAATATTTACGAGTGATAAGAAAGCTTTCCTTGCAACTTT
BIG-ORF         GCTTTCATCATTGGTTGGCAAATATTTACGAGTGATAAGAAAGCTTTCCTTGCAACTTT
BIG-TAIR        GCTTTCATCATTGGTTGGCAAATATTTACGAGTGATAAGAAAGCTTTCCTTGCAACTTT
*****
BIG-GENOME      CAGCGATTGGAATCATCACGGTCATAGTTCGCCTTCTCTGCTACTTCTCAAGCATACTCA
BIG-ORF         CAGCGATTGGAATCATCACGGTCATAGTTCGCCTTCTCTGCTACTTCTCAAGCATACTCA
BIG-TAIR        CAGCGATTGGAATCATCACGGTCATAGTTCGCCTTCTCTGCTACTTCTCAAGCATACTCA
*****
BIG-GENOME      ATTTGGTAAAAGTCTCCAAGGTGAATATGCGAAGATTGGTGACAATTCTCTCCATCTTCA
BIG-ORF         ATTTGGTAAAAGTCTCCAAGGTGAATATGCGAAGATTGGTGACAATTCTCTCCATCTTCA
BIG-TAIR        ATTTGGTAAAAGTCTCCAAGGTGAATATGCGAAGATTGGTGACAATTCTCTCCATCTTCA
*****
BIG-GENOME      ATGCATCTTTTATCTGTCAAAACTGGATTCCCTGGGAGATGGAAGAGGTTCCGGTGTTTT
BIG-ORF         ATGCATCTTTTATCTGTCAAAACTGGATTCCCTGGGAGATGGAAGAGGTTCCGGTGTTTT
BIG-TAIR        ATGCATCTTTTATCTGTCAAAACTGGATTCCCTGGGAGATGGAAGAGGTTCCGGTGTTTT
*****
BIG-GENOME      ATGGAAGTGTTTTGGGAATTTATGGTACATGGGTTCCCACTAGTCTTCAAACCTCTAG
BIG-ORF         ATGGAAGTGTTTTGGGAATTTATGGTACATGGGTTCCCACTAGTCTTCAAACCTCTAG
BIG-TAIR        ATGGAAGTGTTTTGGGAATTTATGGTACATGGGTTCCCACTAGTCTTCAAACCTCTAG
*****
BIG-GENOME      TGCGATTCTTCTTCATGTATTCTAAGCATAAAGATGCATTGTGCTGACAATAAATGGCTT
BIG-ORF         TGCGATTCTTCTTCATGTATTCTAAGCATAAAGATGCATTGTGCTGACAATAAATGGCTT
BIG-TAIR        TGCGATTCTTCTTCATGTATTCTAAGCATAAAGATGCATTGTGCTGACAATAAATGGCTT
```

```
*****
BIG-GENOME ACTCAAAGTGGGTAACCTAAGGAGAAGTTGGGGTAGATACTAGTGTACTTCATCAGCT
BIG-ORF ACTCAAAGTGGGTAACCTAAGGAGAAGTTGGGGTAGATACTAGTGTACTTCATCAGCT
BIG-TAIR ACTCAAAGTGGGTAACCTAAGGAGAAGTTGGGGTAGATACTAGTGTACTTCATCAGCT
*****
BIG-GENOME ACTTGATTCTATCATGATTATTAAGTTTGACCAGGTATTCGAAAGCTTTCATGGGAAATG
BIG-ORF ACTTGATTCTATCATGATTATTAAGTTTGACCAGGTATTCGAAAGCTTTCATGGGAAATG
BIG-TAIR ACTTGATTCTATCATGATTATTAAGTTTGACCAGGTATTCGAAAGCTTTCATGGGAAATG
*****
BIG-GENOME TGAGGAGATCCATCAAAATATATGTGCCGTGTGCAGCTTCCAGATTGACTGAGTTGTT
BIG-ORF TGAGGAGATCCATCAAAATATATGTGCCGTGTGCAGCTTCCAGATTGACTGAGTTGTT
BIG-TAIR TGAGGAGATCCATCAAAATATATGTGCCGTGTGCAGCTTCCAGATTGACTGAGTTGTT
*****
BIG-GENOME TCTGATGAAAGACATGGAGGGTTTGTAAAGAGATATCAGTGCTGAGCAGATAGATAGAAG
BIG-ORF TCTGATGAAAGACATGGAGGGTTTGTAAAGAGATATCAGTGCTGAGCAGATAGATAGAAG
BIG-TAIR TCTGATGAAAGACATGGAGGGTTTGTAAAGAGATATCAGTGCTGAGCAGATAGATAGAAG
*****
BIG-GENOME CCAAGTGCTTGAAGGGGTGATCACCAAGATTGTAGATGTTATGGACAGTCTAAGCAAGGA
BIG-ORF CCAAGTGCTTGAAGGGGTGATCACCAAGATTGTAGATGTTATGGACAGTCTAAGCAAGGA
BIG-TAIR CCAAGTGCTTGAAGGGGTGATCACCAAGATTGTAGATGTTATGGACAGTCTAAGCAAGGA
*****
BIG-GENOME TTCTTCGAAATCTGATATTTCAAATTTTATCTTGGGTAGATGCAGTCTCTGAGCATACT
BIG-ORF TTCTTCGAAATCTGATATTTCAAATTTTATCTTGGGTAGATGCAGTCTCTGAGCATACT
BIG-TAIR TTCTTCGAAATCTGATATTTCAAATTTTATCTTGGGTAGATGCAGTCTCTGAGCATACT
*****
BIG-GENOME CAGGGAATTTTATGAGTTGCAACGTGGAGATCTGCTGTGTTTATTGACTATTGGACTA
BIG-ORF CAGGGAATTTTATGAGTTGCAACGTGGAGATCTGCTGTGTTTATTGACTATTGGACTA
BIG-TAIR CAGGGAATTTTATGAGTTGCAACGTGGAGATCTGCTGTGTTTATTGACTATTGGACTA
*****
BIG-GENOME CTGTTCCCTTGAACCCAGTAAACATAAAAAGTACTTAACTTCCTTGTGACCTTTTGTCTGT
BIG-ORF CTGTTCCCTTGAACCCAGTAAACATAAAAAGTACTTAACTTCCTTGTGACCTTTTGTCTGT
BIG-TAIR CTGTTCCCTTGAACCCAGTAAACATAAAAAGTACTTAACTTCCTTGTGACCTTTTGTCTGT
*****
BIG-GENOME GGCTCAATCCCCTGATCTCCGGAGAAGAGTACAACAAAAATTTATTGACATGGATTGAT
BIG-ORF GGCTCAATCCCCTGATCTCCGGAGAAGAGTACAACAAAAATTTATTGACATGGATTGAT
BIG-TAIR GGCTCAATCCCCTGATCTCCGGAGAAGAGTACAACAAAAATTTATTGACATGGATTGAT
*****
BIG-GENOME ATCTTTGTCTGGGTGGCTGGAGAGAAGACTGTTGGGTCCTTCGTTGAAGAAATAGATGG
BIG-ORF ATCTTTGTCTGGGTGGCTGGAGAGAAGACTGTTGGGTCCTTCGTTGAAGAAATAGATGG
BIG-TAIR ATCTTTGTCTGGGTGGCTGGAGAGAAGACTGTTGGGTCCTTCGTTGAAGAAATAGATGG
*****
BIG-GENOME GAAAAAGACTGCAAAAGGAAATCTCTTCCTTTCAGAGAGGCAGCAATGAATTTTATTAA
BIG-ORF GAAAAAGACTGCAAAAGGAAATCTCTTCCTTTCAGAGAGGCAGCAATGAATTTTATTAA
BIG-TAIR GAAAAAGACTGCAAAAGGAAATCTCTTCCTTTCAGAGAGGCAGCAATGAATTTTATTAA
```



```

*****
BIG-GENOME      TTGCTTGTGTCATCTACTAACGACCTACAGACCAGAGAGTTACAGAATCATTATTTCGA
BIG-ORF         TTGCTTGTGTCATCTACTAACGACCTACAGACCAGAGAGTTACAGAATCATTATTTCGA
BIG-TAIR        TTGCTTGTGTCATCTACTAACGACCTACAGACCAGAGAGTTACAGAATCATTATTTCGA
*****
BIG-GENOME      GGCCTTGTGATCTCCCTCGATACCGCGTTTCTCTCATTGATATCCATATGCTATGTC
BIG-ORF         GGCCTTGTGATCTCCCTCGATACCGCGTTTCTCTCATTGATATCCATATGCTATGTC
BIG-TAIR        GGCCTTGTGATCTCCCTCGATACCGCGTTTCTCTCATTGATATCCATATGCTATGTC
*****
BIG-GENOME      ATATTTTCATTTTGTCTTCAACTTGCAAGGAAGACAACCTGATGAAGATGGTTTAAA
BIG-ORF         ATATTTTCATTTTGTCTTCAACTTGCAAGGAAGACAACCTGATGAAGATGGTTTAAA
BIG-TAIR        ATATTTTCATTTTGTCTTCAACTTGCAAGGAAGACAACCTGATGAAGATGGTTTAAA
*****
BIG-GENOME      GAGAACCATAATGCTGATGGAGAAGCTTGCTGCCGAGGAGAAGTTGCTTCTGGTTGAA
BIG-ORF         GAGAACCATAATGCTGATGGAGAAGCTTGCTGCCGAGGAGAAGTTGCTTCTGGTTGAA
BIG-TAIR        GAGAACCATAATGCTGATGGAGAAGCTTGCTGCCGAGGAGAAGTTGCTTCTGGTTGAA
*****
BIG-GENOME      GTTTATTTTGGTGTGATAGGCACCTTGTGAGCAACCGTTCTCCAAGTCATGGAGAGAG
BIG-ORF         GTTTATTTTGGTGTGATAGGCACCTTGTGAGCAACCGTTCTCCAAGTCATGGAGAGAG
BIG-TAIR        GTTTATTTTGGTGTGATAGGCACCTTGTGAGCAACCGTTCTCCAAGTCATGGAGAGAG
*****
BIG-GENOME      TTTGTGTGAAAGTCCTTGGAAGCTATAAGAATACTGCAACAGGTCCTTGGTCCAAA
BIG-ORF         TTTGTGTGAAAGTCCTTGGAAGCTATAAGAATACTGCAACAGGTCCTTGGTCCAAA
BIG-TAIR        TTTGTGTGAAAGTCCTTGGAAGCTATAAGAATACTGCAACAGGTCCTTGGTCCAAA
*****
BIG-GENOME      ACTTTCAGGAACAACGAAAAATCTGATACATTGGCTCTCCCGTGGATCAGGAAGGAAG
BIG-ORF         ACTTTCAGGAACAACGAAAAATCTGATACATTGGCTCTCCCGTGGATCAGGAAGGAAG
BIG-TAIR        ACTTTCAGGAACAACGAAAAATCTGATACATTGGCTCTCCCGTGGATCAGGAAGGAAG
*****
BIG-GENOME      CTCAATATCACTTGAATGCGATGTCACCTCTGTTGATGAAGATGAAGATGATGGAACATC
BIG-ORF         CTCAATATCACTTGAATGCGATGTCACCTCTGTTGATGAAGATGAAGATGATGGAACATC
BIG-TAIR        CTCAATATCACTTGAATGCGATGTCACCTCTGTTGATGAAGATGAAGATGATGGAACATC
*****
BIG-GENOME      TGATGGTGAAGTGCCAGCTTAGACAAGGAAGATGAAGAAGATGCCAACAGTGAGAGGTA
BIG-ORF         TGATGGTGAAGTGCCAGCTTAGACAAGGAAGATGAAGAAGATGCCAACAGTGAGAGGTA
BIG-TAIR        TGATGGTGAAGTGCCAGCTTAGACAAGGAAGATGAAGAAGATGCCAACAGTGAGAGGTA
*****
BIG-GENOME      CCTTGCCCTAAAAGTCTGCACCTTTACGTCCAGTGGCAGTAATTCATGGAACAACACTG
BIG-ORF         CCTTGCCCTAAAAGTCTGCACCTTTACGTCCAGTGGCAGTAATTCATGGAACAACACTG
BIG-TAIR        CCTTGCCCTAAAAGTCTGCACCTTTACGTCCAGTGGCAGTAATTCATGGAACAACACTG
*****
BIG-GENOME      GTATTTTGTACACTTGTGACCTTACTGTGCCAAAGGTTGCTGTTCTGTTGCGCGAA
BIG-ORF         GTATTTTGTACACTTGTGACCTTACTGTGCCAAAGGTTGCTGTTCTGTTGCGCGAA
BIG-TAIR        GTATTTTGTACACTTGTGACCTTACTGTGCCAAAGGTTGCTGTTCTGTTGCGCGAA

```

```

*****
BIG-GENOME AGTTTGCCACCGGGGCACCGTGTGTCTATTACAGATCGAGTCGGTTTTTCTGTGACTG
BIG-ORF AGTTTGCCACCGGGGCACCGTGTGTCTATTACAGATCGAGTCGGTTTTTCTGTGACTG
BIG-TAIR AGTTTGCCACCGGGGCACCGTGTGTCTATTACAGATCGAGTCGGTTTTTCTGTGACTG
*****
BIG-GENOME TGGAGCTGGAGGTGTAGGGGAAGCAGCTGCCAGTGCCTGAAGCCACGAAATATAATGG
BIG-ORF TGGAGCTGGAGGTGTAGGGGAAGCAGCTGCCAGTGCCTGAAGCCACGAAATATAATGG
BIG-TAIR TGGAGCTGGAGGTGTAGGGGAAGCAGCTGCCAGTGCCTGAAGCCACGAAATATAATGG
*****
BIG-GENOME AAATGGAAGTGCTCCAGCTCGTGGTACAAATAATTCCAATCGTTTTTACCCTTGTCTGA
BIG-ORF AAATGGAAGTGCTCCAGCTCGTGGTACAAATAATTCCAATCGTTTTTACCCTTGTCTGA
BIG-TAIR AAATGGAAGTGCTCCAGCTCGTGGTACAAATAATTCCAATCGTTTTTACCCTTGTCTGA
*****
BIG-GENOME GGATGCAGATCAGCTTGGAGAAAGCGATTCCGGATGTGGAAGAAGATGGTTTCGGGGAGGA
BIG-ORF GGATGCAGATCAGCTTGGAGAAAGCGATTCCGGATGTGGAAGAAGATGGTTTCGGGGAGGA
BIG-TAIR GGATGCAGATCAGCTTGGAGAAAGCGATTCCGGATGTGGAAGAAGATGGTTTCGGGGAGGA
*****
BIG-GENOME AAATCACGTTGTCTTATATATCCCTAAAGAACTCAATATAAGATGTCACTGCTACTCGA
BIG-ORF AAATCACGTTGTCTTATATATCCCTAAAGAACTCAATATAAGATGTCACTGCTACTCGA
BIG-TAIR AAATCACGTTGTCTTATATATCCCTAAAGAACTCAATATAAGATGTCACTGCTACTCGA
*****
BIG-GENOME AGAGCTCGGGATAGAGGACCGAGTACTGGAGCTTTTCTCATCTTACTTCCGCTATCAC
BIG-ORF AGAGCTCGGGATAGAGGACCGAGTACTGGAGCTTTTCTCATCTTACTTCCGCTATCAC
BIG-TAIR AGAGCTCGGGATAGAGGACCGAGTACTGGAGCTTTTCTCATCTTACTTCCGCTATCAC
*****
BIG-GENOME TAGCAAAGAGACTCTGGCCTGTCGAAAGAGAAGCAGGTCAATCTCGGAAAGACAAAGT
BIG-ORF TAGCAAAGAGACTCTGGCCTGTCGAAAGAGAAGCAGGTCAATCTCGGAAAGACAAAGT
BIG-TAIR TAGCAAAGAGACTCTGGCCTGTCGAAAGAGAAGCAGGTCAATCTCGGAAAGACAAAGT
*****
BIG-GENOME TCTTTCATTGACACGGATCTTTGACAGCTGAAAAAAGCATATAAAAAGTGGGTCATTGGA
BIG-ORF TCTTTCATTGACACGGATCTTTGACAGCTGAAAAAAGCATATAAAAAGTGGGTCATTGGA
BIG-TAIR TCTTTCATTGACACGGATCTTTGACAGCTGAAAAAAGCATATAAAAAGTGGGTCATTGGA
*****
BIG-GENOME CTTAAAAATAAAGGCTGATTATACTAATTCAAAGGACCTTAAATCTCTTTTAGCCAATGG
BIG-ORF CTTAAAAATAAAGGCTGATTATACTAATTCAAAGGACCTTAAATCTCTTTTAGCCAATGG
BIG-TAIR CTTAAAAATAAAGGCTGATTATACTAATTCAAAGGACCTTAAATCTCTTTTAGCCAATGG
*****
BIG-GENOME TTCCCTTGTCAAGTCTCCTGAGTGTAGTGTTCGGGGTCGCCTTGCAAGTTGGAGAAGG
BIG-ORF TTCCCTTGTCAAGTCTCCTGAGTGTAGTGTTCGGGGTCGCCTTGCAAGTTGGAGAAGG
BIG-TAIR TTCCCTTGTCAAGTCTCCTGAGTGTAGTGTTCGGGGTCGCCTTGCAAGTTGGAGAAGG
*****
BIG-GENOME TGATAAAGTTGCTATATTTGATGTTGGACAGCTAATAGGACAAGCCACAATTGCACCCAT
BIG-ORF TGATAAAGTTGCTATATTTGATGTTGGACAGCTAATAGGACAAGCCACAATTGCACCCAT
BIG-TAIR TGATAAAGTTGCTATATTTGATGTTGGACAGCTAATAGGACAAGCCACAATTGCACCCAT

```

```

*****
BIG-GENOME AAATGCAGACAAGGCCAACGTTAAACCACTTCAAGGAATATTGTTGTTTGGAGATTGT
BIG-ORF AAATGCAGACAAGGCCAACGTTAAACCACTTCAAGGAATATTGTTGTTTGGAGATTGT
BIG-TAIR AAATGCAGACAAGGCCAACGTTAAACCACTTCAAGGAATATTGTTGTTTGGAGATTGT
*****
BIG-GENOME GCATCTTTCATTCAACCCAGTTGTGGAGAATTATCTTGCTGTCGACAGCCTTGAAGATTG
BIG-ORF GCATCTTTCATTCAACCCAGTTGTGGAGAATTATCTTGCTGTCGACAGCCTTGAAGATTG
BIG-TAIR GCATCTTTCATTCAACCCAGTTGTGGAGAATTATCTTGCTGTCGACAGCCTTGAAGATTG
*****
BIG-GENOME CCAGATACTTACTTTGAATCATCGAGGTGAAGTCATCGACAGGCTTGTGTTGAGCTTGC
BIG-ORF CCAGATACTTACTTTGAATCATCGAGGTGAAGTCATCGACAGGCTTGTGTTGAGCTTGC
BIG-TAIR CCAGATACTTACTTTGAATCATCGAGGTGAAGTCATCGACAGGCTTGTGTTGAGCTTGC
*****
BIG-GENOME CCTGCAAGGTGCATTATCAGGCGTATAGACTGGGTTCTGGTTCACAGGTTCAAGTTAAT
BIG-ORF CCTGCAAGGTGCATTATCAGGCGTATAGACTGGGTTCTGGTTCACAGGTTCAAGTTAAT
BIG-TAIR CCTGCAAGGTGCATTATCAGGCGTATAGACTGGGTTCTGGTTCACAGGTTCAAGTTAAT
*****
BIG-GENOME GGTGCTTACGAACAAATTCGTGAAGTTTATGATCTATCCCAGGATAGCATCAGTCCAAC
BIG-ORF GGTGCTTACGAACAAATTCGTGAAGTTTATGATCTATCCCAGGATAGCATCAGTCCAAC
BIG-TAIR GGTGCTTACGAACAAATTCGTGAAGTTTATGATCTATCCCAGGATAGCATCAGTCCAAC
*****
BIG-GENOME ACAGTACTTCACTTTGCCAAACGACATGATTGTGGATGCTACTCTTTTGTGCTTCTCG
BIG-ORF ACAGTACTTCACTTTGCCAAACGACATGATTGTGGATGCTACTCTTTTGTGCTTCTCG
BIG-TAIR ACAGTACTTCACTTTGCCAAACGACATGATTGTGGATGCTACTCTTTTGTGCTTCTCG
*****
BIG-GENOME TGGGAGGGTTTTCTTCTTGTCTTTCAGAACAAAGGGAATTGTATAGGTTGAACTATC
BIG-ORF TGGGAGGGTTTTCTTCTTGTCTTTCAGAACAAAGGGAATTGTATAGGTTGAACTATC
BIG-TAIR TGGGAGGGTTTTCTTCTTGTCTTTCAGAACAAAGGGAATTGTATAGGTTGAACTATC
*****
BIG-GENOME TTGGGGCGGCAATGCAGGCGCAACACCGCTTAAGGAAATCGTTCAGATTATGGGAAAGGA
BIG-ORF TTGGGGCGGCAATGCAGGCGCAACACCGCTTAAGGAAATCGTTCAGATTATGGGAAAGGA
BIG-TAIR TTGGGGCGGCAATGCAGGCGCAACACCGCTTAAGGAAATCGTTCAGATTATGGGAAAGGA
*****
BIG-GENOME TGTTACGGGAAAGGGTTCATCTGTCTATTTCTCTCCAACATATCGACTGCTTTTCATATC
BIG-ORF TGTTACGGGAAAGGGTTCATCTGTCTATTTCTCTCCAACATATCGACTGCTTTTCATATC
BIG-TAIR TGTTACGGGAAAGGGTTCATCTGTCTATTTCTCTCCAACATATCGACTGCTTTTCATATC
*****
BIG-GENOME CTATCATGATGGAAGTCTTTTATGGGTCGACTCAGCTCAGATGCAACATCCTTAACTGA
BIG-ORF CTATCATGATGGAAGTCTTTTATGGGTCGACTCAGCTCAGATGCAACATCCTTAACTGA
BIG-TAIR CTATCATGATGGAAGTCTTTTATGGGTCGACTCAGCTCAGATGCAACATCCTTAACTGA
*****
BIG-GENOME TACATCTGGCATGTTTGGGAAGAATCAGATTGTAACAAAAGGGTGGCTGGATTGCATCG
BIG-ORF TACATCTGGCATGTTTGGGAAGAATCAGATTGTAACAAAAGGGTGGCTGGATTGCATCG
BIG-TAIR TACATCTGGCATGTTTGGGAAGAATCAGATTGTAACAAAAGGGTGGCTGGATTGCATCG

```

```

*****
BIG-GENOME      TTGAAAAGAGTTGTTGGCTGGCAGTGGATTATTTATTGCTTCTCCAGCGTGAAGTCAAA
BIG-ORF         TTGAAAAGAGTTGTTGGCTGGCAGTGGATTATTTATTGCTTCTCCAGCGTGAAGTCAAA
BIG-TAIR        TTGAAAAGAGTTGTTGGCTGGCAGTGGATTATTTATTGCTTCTCCAGCGTGAAGTCAAA
*****
BIG-GENOME      TGCTGTCTTAGCTGTGTCCTTGAGGGGCGATGGGGTATGTGCACAGAATCTCCGTCATCC
BIG-ORF         TGCTGTCTTAGCTGTGTCCTTGAGGGGCGATGGGGTATGTGCACAGAATCTCCGTCATCC
BIG-TAIR        TGCTGTCTTAGCTGTGTCCTTGAGGGGCGATGGGGTATGTGCACAGAATCTCCGTCATCC
*****
BIG-GENOME      GACAGGATCATCTCCCTATGGTTGGAATAACCGCATACAAACCTTGTCAAAAGACAA
BIG-ORF         GACAGGATCATCTCCCTATGGTTGGAATAACCGCATACAAACCTTGTCAAAAGACAA
BIG-TAIR        GACAGGATCATCTCCCTATGGTTGGAATAACCGCATACAAACCTTGTCAAAAGACAA
*****
BIG-GENOME      TGTTCACTGTCTAGTTCTGCATGATGATGCCAGCCTTCAGATTTATTCTCATGTTCTGAT
BIG-ORF         TGTTCACTGTCTAGTTCTGCATGATGATGCCAGCCTTCAGATTTATTCTCATGTTCTGAT
BIG-TAIR        TGTTCACTGTCTAGTTCTGCATGATGATGCCAGCCTTCAGATTTATTCTCATGTTCTGAT
*****
BIG-GENOME      TGGAGTTGATACTGACTCAAATTCACAGCTGAAAAAGTTAAAAAGTTGGGTTCTAAGAT
BIG-ORF         TGGAGTTGATACTGACTCAAATTCACAGCTGAAAAAGTTAAAAAGTTGGGTTCTAAGAT
BIG-TAIR        TGGAGTTGATACTGACTCAAATTCACAGCTGAAAAAGTTAAAAAGTTGGGTTCTAAGAT
*****
BIG-GENOME      ACTTAACAACAAAACCTATGCTGGTCAAAGCCAGAGTTCCCTGGATTCTTTGAGAG
BIG-ORF         ACTTAACAACAAAACCTATGCTGGTCAAAGCCAGAGTTCCCTGGATTCTTTGAGAG
BIG-TAIR        ACTTAACAACAAAACCTATGCTGGTCAAAGCCAGAGTTCCCTGGATTCTTTGAGAG
*****
BIG-GENOME      GGCATTTTGCATTACAGCAGATGTGAGACTTGGTAGTGATGCTATTAGAAATGGTGATTC
BIG-ORF         GGCATTTTGCATTACAGCAGATGTGAGACTTGGTAGTGATGCTATTAGAAATGGTGATTC
BIG-TAIR        GGCATTTTGCATTACAGCAGATGTGAGACTTGGTAGTGATGCTATTAGAAATGGTGATTC
*****
BIG-GENOME      CGAGGGAGCAAAACAGAGCTTGGCATCTGAGGATGGCTTTATTGAGAGCCCAGTCCCGT
BIG-ORF         CGAGGGAGCAAAACAGAGCTTGGCATCTGAGGATGGCTTTATTGAGAGCCCAGTCCCGT
BIG-TAIR        CGAGGGAGCAAAACAGAGCTTGGCATCTGAGGATGGCTTTATTGAGAGCCCAGTCCCGT
*****
BIG-GENOME      GGGCTTCAAGTATGGTTGGAATTCTGAGTAATTTTCTTGATAAGTTTATCTGCATAC
BIG-ORF         GGGCTTCAAG-----
BIG-TAIR        GGGCTTCAAG-----
*****
BIG-GENOME      TATGCTTGGTTATTAGTTTAGTACTCTGAAGAGATTTTGTCCGCCAATTATGAGTATA
BIG-ORF         -----
BIG-TAIR        -----
*****
BIG-GENOME      TGGGTTGCTTGTCTCCAGTTATCTAACCTCCTTCTCTTTTCAGATATCTGTCTCCAATC
BIG-ORF         -----ATATCTGTCTCCAATC
BIG-TAIR        -----ATATCTGTCTCCAATC

```

```

*****
BIG-GENOME   CAAACCCCTGACATTGTTATGGTTGGCATCCGGATGCATGTGGGTACTACATCAGCAAGCT
BIG-ORF      CAAACCCCTGACATTGTTATGGTTGGCATCCGGATGCATGTGGGTACTACATCAGCAAGCT
BIG-TAIR     CAAACCCCTGACATTGTTATGGTTGGCATCCGGATGCATGTGGGTACTACATCAGCAAGCT
*****

BIG-GENOME   CTATACCTTCAGAAGTGACCATTTCCAGAGATCGATTAAGATGGATGAGGGCATGAGGT
BIG-ORF      CTATACCTTCAGAAGTGACCATTTCCAGAGATCGATTAAGATGGATGAGGGCATGAGGT
BIG-TAIR     CTATACCTTCAGAAGTGACCATTTCCAGAGATCGATTAAGATGGATGAGGGCATGAGGT
*****

BIG-GENOME   GCTGGTATGACATCCCATTACTGTGGCTGAGTCACTTCTAGCTGATGAAGATGTTGTAA
BIG-ORF      GCTGGTATGACATCCCATTACTGTGGCTGAGTCACTTCTAGCTGATGAAGATGTTGTAA
BIG-TAIR     GCTGGTATGACATCCCATTACTGTGGCTGAGTCACTTCTAGCTGATGAAGATGTTGTAA
*****

BIG-GENOME   TCTCTGTGGGGCCGACTACTAGTGGGACTGCACTGCCCAGAATAGACTCGCTTGAAGTAT
BIG-ORF      TCTCTGTGGGGCCGACTACTAGTGGGACTGCACTGCCCAGAATAGACTCGCTTGAAGTAT
BIG-TAIR     TCTCTGTGGGGCCGACTACTAGTGGGACTGCACTGCCCAGAATAGACTCGCTTGAAGTAT
*****

BIG-GENOME   ATGGTCGAGCTAAAGATGAATTTGGCTGGAAAGAAAAAATGGATGCTGTGCTAGATATGG
BIG-ORF      ATGGTCGAGCTAAAGATGAATTTGGCTGGAAAGAAAAAATGGATGCTGTGCTAGATATGG
BIG-TAIR     ATGGTCGAGCTAAAGATGAATTTGGCTGGAAAGAAAAAATGGATGCTGTGCTAGATATGG
*****

BIG-GENOME   AAGCTCGTGTGCTTGGTCATGGTTTGCTTCTCCAGGCTCTAGTAAAAAGAGAGCGTTGG
BIG-ORF      AAGCTCGTGTGCTTGGTCATGGTTTGCTTCTCCAGGCTCTAGTAAAAAGAGAGCGTTGG
BIG-TAIR     AAGCTCGTGTGCTTGGTCATGGTTTGCTTCTCCAGGCTCTAGTAAAAAGAGAGCGTTGG
*****

BIG-GENOME   CACAGTCTGCTTCAATGGAAGACAAGTTATCGCTGATGGTCTTAAGCTCCTATCAATCT
BIG-ORF      CACAGTCTGCTTCAATGGAAGACAAGTTATCGCTGATGGTCTTAAGCTCCTATCAATCT
BIG-TAIR     CACAGTCTGCTTCAATGGAAGACAAGTTATCGCTGATGGTCTTAAGCTCCTATCAATCT
*****

BIG-GENOME   ATTATTCAGTTTGTAGGCCACGGCAAGAAGTAGTGCTTAGCGAACTCAAATGCAAACAGC
BIG-ORF      ATTATTCAGTTTGTAGGCCACGGCAAGAAGTAGTGCTTAGCGAACTCAAATGCAAACAGC
BIG-TAIR     ATTATTCAGTTTGTAGGCCACGGCAAGAAGTAGTGCTTAGCGAACTCAAATGCAAACAGC
*****

BIG-GENOME   TACTAGAGACGATTTTCGAAAAGTGATAGGGAACCCTATTACAAACGACAGCTTGCCGTG
BIG-ORF      TACTAGAGACGATTTTCGAAAAGTGATAGGGAACCCTATTACAAACGACAGCTTGCCGTG
BIG-TAIR     TACTAGAGACGATTTTCGAAAAGTGATAGGGAACCCTATTACAAACGACAGCTTGCCGTG
*****

BIG-GENOME   TTTTGCAGTCTGTCTTTCCAAGAAAGGAGATATACTACCAGGTAATGTTTCTACCAAATT
BIG-ORF      TTTTGCAGTCTGTCTTTCCAAGAAAGGAGATATACTACCAG-----
BIG-TAIR     TTTTGCAGTCTGTCTTTCCAAGAAAGGAGATATACTACCAGGTAATGTTTCTACCAAATT
*****

BIG-GENOME   CAGTCTTGCATGTTCAAGTAGATATTTCCGGGCGCAGATATCTTTAAATTTGTATGTTGT
BIG-ORF      -----

```

BIG-TAIR CAG-----

BIG-GENOME CTTTGGCATTGATTATATCTGTTGCTATAGGTCAAAGACACCATGCGACTCCTTGGAGTG

BIG-ORF -----GTCAAAGACACCATGCGACTCCTTGGAGTG

BIG-TAIR -----TCAAAGACACCATGCGACTCCTTGGAGTG

\*\*\*\*\*

BIG-GENOME GTCAAGGTGACCTCCATTCTTTCTTCGAGGTTGGGATTTGGGTACTGGAGGTTTCGATT

BIG-ORF GTCAAGGTGACCTCCATTCTTTCTTCGAGGTTGGGATTTGGGTACTGGAGGTTTCGATT

BIG-TAIR GTCAAGGTGACCTCCATTCTTTCTTCGAGGTTGGGATTTGGGTACTGGAGGTTTCGATT

\*\*\*\*\*

BIG-GENOME GTTGAAGAGTTCAATGCTCAGATGCGGGCGGTCTAAAGTAGCTTGACCCGTAATCA

BIG-ORF GTTGAAGAGTTCAATGCTCAGATGCGGGCGGTCTAAAGTAGCTTGACCCGTAATCA

BIG-TAIR GTTGAAGAGTTCAATGCTCAGATGCGGGCGGTCTAAAGTAGCTTGACCCGTAATCA

\*\*\*\*\*

BIG-GENOME AATTTCCTCCGCTTTCTGGAGATGAATGGTATATGCTGTTTCAGTTATTATCTACAGTGT

BIG-ORF AATTTCCTCCGCTTTCTGGAGATGAATG-----

BIG-TAIR AATTTCCTCCGCTTTCTGGAGATGAATG-----

\*\*\*\*\*

BIG-GENOME GTCTATTTGCATGTGTAGTCAAATTCAAACACAATTTGTTTATTATCCTTGTATTAT

BIG-ORF -----

BIG-TAIR -----

BIG-GENOME GTAATAGGAGCGGCTGTTTGTACATAAAATAATCTTCCTTTCATATAGTTTGTATTAT

BIG-ORF -----

BIG-TAIR -----

BIG-GENOME ATGAGATATGTTGTTATGTAGGCTCTGAAGTGGTTGATAATCTGATGCAAGTGCTATGG

BIG-ORF -----GCTCTGAAGTGGTTGATAATCTGATGCAAGTGCTATGG

BIG-TAIR -----GCTCTGAAGTGGTTGATAATCTGATGCAAGTGCTATGG

\*\*\*\*\*

BIG-GENOME GGAATTTTGGAGTCAGAGCCACTCGACACACCTACTATGAACAATGTCGTGATGTCCTCC

BIG-ORF GGAATTTTGGAGTCAGAGCCACTCGACACACCTACTATGAACAATGTCGTGATGTCCTCC

BIG-TAIR GGAATTTTGGAGTCAGAGCCACTCGACACACCTACTATGAACAATGTCGTGATGTCCTCC

\*\*\*\*\*

BIG-GENOME GTTGAACATAATCTATAGCTATGCAGAGTGTGGCATCTCAAGGAAAGGATACAGGGTT

BIG-ORF GTTGAACATAATCTATAGCTATGCAGAGTGTGGCATCTCAAGGAAAGGATACAGGGTT

BIG-TAIR GTTGAACATAATCTATAGCTATGCAGAGTGTGGCATCTCAAGGAAAGGATACAGGGTT

\*\*\*\*\*

BIG-GENOME CATTCTGTAGCTCCTGCAGTTCAGTTACTGAAAGCACTTATGTTGTTCCCAATGAGTCT

BIG-ORF CATTCTGTAGCTCCTGCAGTTCAGTTACTGAAAGCACTTATGTTGTTCCCAATGAGTCT

BIG-TAIR CATTCTGTAGCTCCTGCAGTTCAGTTACTGAAAGCACTTATGTTGTTCCCAATGAGTCT

\*\*\*\*\*

BIG-GENOME GTGCAAACATCCAGCAGGTGTCTTGTGTATGTTTTTATACTCTGCTCTCTTAGATA

BIG-ORF GTGCAAACATCCAGCAG-----

BIG-TAIR GTGCAACATCCAGCAGGTGTGTTCTTGT-----  
 \*\*\*\*\*  
 BIG-GENOME TGTACTAGTCTTCTAACTCAGTTTCTTTACAGCCTAGCTATATCATCAAGGTTACTTCAG  
 BIG-ORF -----CCTAGCTATATCATCAAGGTTACTTCAG  
 BIG-TAIR -----CCTAGCTATATCATCAAGGTTACTTCAG  
 \*\*\*\*\*  
 BIG-GENOME GTTCCTTTCCCAAAGCAAACAATGTTGACAACAGATGATTTGGTTGACAATGTTACAAC  
 BIG-ORF GTTCCTTTCCCAAAGCAAACAATGTTGACAACAGATGATTTGGTTGACAATGTTACAAC  
 BIG-TAIR GTTCCTTTCCCAAAGCAAACAATGTTGACAACAGATGATTTGGTTGACAATGTTACAAC  
 \*\*\*\*\*  
 BIG-GENOME CCTTCGGTGCCTATCAGAACAGCTGGTGGAAATACACATGTCATGATTGAGGAGGACTCT  
 BIG-ORF CCTTCGGTGCCTATCAGAACAGCTGGTGGAAATACACATGTCATGATTGAGGAGGACTCT  
 BIG-TAIR CCTTCGGTGCCTATCAGAACAGCTGGTGGAAATACACATGTCATGATTGAGGAGGACTCT  
 \*\*\*\*\*  
 BIG-GENOME ATAACCTCATCTGTTCAATACTGCTGTGATGGCTGCTCCACCGTCCCTATACTGAGAAGA  
 BIG-ORF ATAACCTCATCTGTTCAATACTGCTGTGATGGCTGCTCCACCGTCCCTATACTGAGAAGA  
 BIG-TAIR ATAACCTCATCTGTTCAATACTGCTGTGATGGCTGCTCCACCGTCCCTATACTGAGAAGA  
 \*\*\*\*\*  
 BIG-GENOME AGGTGGCACTGCACTGTTTGTCCAGATTTTGATCTATGTGAGGCATGCTATGAAGTGTA  
 BIG-ORF AGGTGGCACTGCACTGTTTGTCCAGATTTTGATCTATGTGAGGCATGCTATGAAGTGTA  
 BIG-TAIR AGGTGGCACTGCACTGTTTGTCCAGATTTTGATCTATGTGAGGCATGCTATGAAGTGTA  
 \*\*\*\*\*  
 BIG-GENOME GATGCAGATCGTCTACCACCACCACACTCGAGATCATCCTATGACAGCAATCCAATA  
 BIG-ORF GATGCAGATCGTCTACCACCACCACACTCGAGATCATCCTATGACAGCAATCCAATA  
 BIG-TAIR GATGCAGATCGTCTACCACCACCACACTCGAGATCATCCTATGACAGCAATCCAATA  
 \*\*\*\*\*  
 BIG-GENOME GAAGTGAATCACTTGGTGCAGACCAATGAGATTCAGTTCTCTGCGGATGAAGTAGGT  
 BIG-ORF GAAGTGAATCACTTGGTGCAGACCAATGAGATTCAGTTCTCTGCGGATGAAGTAGGT  
 BIG-TAIR GAAGTGAATCACTTGGTGCAGACCAATGAGATTCAGTTCTCTGCGGATGAAGTAGGT  
 \*\*\*\*\*  
 BIG-GENOME ATTTCAAATATGTTGCCGGTGGTAACCAGTAGCATTCCACAAGCTTCAACTCCCTCCATC  
 BIG-ORF ATTTCAAATATGTTGCCGGTGGTAACCAGTAGCATTCCACAAGCTTCAACTCCCTCCATC  
 BIG-TAIR ATTTCAAATATGTTGCCGGTGGTAACCAGTAGCATTCCACAAGCTTCAACTCCCTCCATC  
 \*\*\*\*\*  
 BIG-GENOME CATGTCTTGGAACCTGGTGAATCTGCTGAGTTCTCTGCCTCACTGACCGATCCTATTCT  
 BIG-ORF CATGTCTTGGAACCTGGTGAATCTGCTGAGTTCTCTGCCTCACTGACCGATCCTATTCT  
 BIG-TAIR CATGTCTTGGAACCTGGTGAATCTGCTGAGTTCTCTGCCTCACTGACCGATCCTATTCT  
 \*\*\*\*\*  
 BIG-GENOME ATCTCAGCGTCAAAGCGTGCCGTAATTTGATTCTCTGAGTTCTCCAAGAGTTG  
 BIG-ORF ATCTCAGCGTCAAAGCGTGCCGTAATTTGATTCTCTGAGTTCTCCAAGAGTTG  
 BIG-TAIR ATCTCAGCGTCAAAGCGTGCCGTAATTTGATTCTCTGAGTTCTCCAAGAGTTG  
 \*\*\*\*\*  
 BIG-GENOME AGTGGATGGATGGAACAGTATCCGGTGTCAAGCTATTCTGTGATGCAATTGTTCTAC  
 BIG-ORF AGTGGATGGATGGAACAGTATCCGGTGTCAAGCTATTCTGTGATGCAATTGTTCTAC

BIG-TAIR AGTGGATGGATGGAACAGTATCCGGTGTTC AAGCTATTCCTGTGATGCAATTGTTCTAC  
\*\*\*\*\*  
BIG-GENOME AGATTATCATCTGCCATTGGTGGAGCCTTATGGATAGCTCAAAGCCC GAAGAAATAAGC  
BIG-ORF AGATTATCATCTGCCATTGGTGGAGCCTTATGGATAGCTCAAAGCCC GAAGAAATAAGC  
BIG-TAIR AGATTATCATCTGCCATTGGTGGAGCCTTATGGATAGCTCAAAGCCC GAAGAAATAAGC  
\*\*\*\*\*  
BIG-GENOME TTGGATAAGTTAATTAATTAATGGCTTTTGGGTGAAATCAATCTCAGCAAGCCGTTGCTGCT  
BIG-ORF TTGGATAAGTTAATTAATTAATGGCTTTTGGGTGAAATCAATCTCAGCAAGCCGTTGCTGCT  
BIG-TAIR TTGGATAAGTTAATTAATTAATGGCTTTTGGGTGAAATCAATCTCAGCAAGCCGTTGCTGCT  
\*\*\*\*\*  
BIG-GENOME TCAACTCGCTCTTCCTTAGGGGAAATTGTGATTCTTGTTATGTTTTTCACCTTGATG  
BIG-ORF TCAACTCGCTCTTCCTTAGGGGAAATTGTGATTCTTGTTATGTTTTTCACCTTGATG  
BIG-TAIR TCAACTCGCTCTTCCTTAGGGGAAATTGTGATTCTTGTTATGTTTTTCACCTTGATG  
\*\*\*\*\*  
BIG-GENOME CTTCGGAGTTGGCACCAGCCTGGTAGTGATGGTAGTAGCTCAAATTAGGTGGAAGTACA  
BIG-ORF CTTCGGAGTTGGCACCAGCCTGGTAGTGATGGTAGTAGCTCAAATTAGGTGGAAGTACA  
BIG-TAIR CTTCGGAGTTGGCACCAGCCTGGTAGTGATGGTAGTAGCTCAAATTAGGTGGAAGTACA  
\*\*\*\*\*  
BIG-GENOME GATGTACATGACCGGAGGATTGTCCAGAGCTCCACTGTAGTAGCTACTCAGTCTTCTTTA  
BIG-ORF GATGTACATGACCGGAGGATTGTCCAGAGCTCCACTGTAGTAGCTACTCAGTCTTCTTTA  
BIG-TAIR GATGTACATGACCGGAGGATTGTCCAGAGCTCCACTGTAGTAGCTACTCAGTCTTCTTTA  
\*\*\*\*\*  
BIG-GENOME CATGTTCAAGAGAGAGATGACTTTGCATCTCAGCTAGTTCGTGCGTGCAGTTGCCTCAGG  
BIG-ORF CATGTTCAAGAGAGAGATGACTTTGCATCTCAGCTAGTTCGTGCGTGCAGTTGCCTCAGG  
BIG-TAIR CATGTTCAAGAGAGAGATGACTTTGCATCTCAGCTAGTTCGTGCGTGCAGTTGCCTCAGG  
\*\*\*\*\*  
BIG-GENOME AACCAAGAGTTTGTTAATTATCTGATGAACATACTTCAACAGCTAGTGCATGTTTTTAAG  
BIG-ORF AACCAAGAGTTTGTTAATTATCTGATGAACATACTTCAACAGCTAGTGCATGTTTTTAAG  
BIG-TAIR AACCAAGAGTTTGTTAATTATCTGATGAACATACTTCAACAGCTAGTGCATGTTTTTAAG  
\*\*\*\*\*  
BIG-GENOME TCACGTGCTGCCAATGTTGAAGCTCGTGGATCAAGCTCTGGTTCTGGTTGTGGAGCCATG  
BIG-ORF TCACGTGCTGCCAATGTTGAAGCTCGTGGATCAAGCTCTGGTTCTGGTTGTGGAGCCATG  
BIG-TAIR TCACGTGCTGCCAATGTTGAAGCTCGTGGATCAAGCTCTGGTTCTGGTTGTGGAGCCATG  
\*\*\*\*\*  
BIG-GENOME CTCACAGTCAGAAGAGATTTACCTGCGGGTAACTATTCTCCCTCTTTTCGGATTCATAT  
BIG-ORF CTCACAGTCAGAAGAGATTTACCTGCGGGTAACTATTCTCCCTCTTTTCGGATTCATAT  
BIG-TAIR CTCACAGTCAGAAGAGATTTACCTGCGGGTAACTATTCTCCCTCTTTTCGGATTCATAT  
\*\*\*\*\*  
BIG-GENOME GCAAAGCCCATAGAGCAGATATTTTGTGGACTATCACAGGCTGCTACTTGAGAATGTG  
BIG-ORF GCAAAGCCCATAGAGCAGATATTTTGTGGACTATCACAGGCTGCTACTTGAGAATGTG  
BIG-TAIR GCAAAGCCCATAGAGCAGATATTTTGTGGACTATCACAGGCTGCTACTTGAGAATGTG  
\*\*\*\*\*  
BIG-GENOME TTTTCGCTTAGTATATACCTTAGTTAGACCTGAAAAACAAGAGAAAATGGGGAAAAAGGAA  
BIG-ORF TTTTCGCTTAGTATATACCTTAGTTAGACCTGAAAAACAAGAGAAAATGGGGAAAAAGGAA



BIG-TAIR TTTGCTTAGTATATACCTTAGTTAGACCTGAAAAACAAGAGAAAATGGGGGAAAAGGAA  
\*\*\*\*\*  
BIG-GENOME AAGGTATACAGGAATGCTTCTTCTAAAGATTTAAAGCTGGACGGTTCCAGGATGTTCTA  
BIG-ORF AAGGTATACAGGAATGCTTCTTCTAAAGATTTAAAGCTGGACGGTTCCAGGATGTTCTA  
BIG-TAIR AAGGTATACAGGAATGCTTCTTCTAAAGATTTAAAGCTGGACGGTTCCAGGATGTTCTA  
\*\*\*\*\*  
BIG-GENOME TGCAGCTATATAAATAACCCTCATACGGCTTTTGTAGGAGATATGCTAGAAGGCTGTT  
BIG-ORF TGCAGCTATATAAATAACCCTCATACGGCTTTTGTAGGAGATATGCTAGAAGGCTGTT  
BIG-TAIR TGCAGCTATATAAATAACCCTCATACGGCTTTTGTAGGAGATATGCTAGAAGGCTGTT  
\*\*\*\*\*  
BIG-GENOME TTGCATCTTTGCGGAAGCAAACTCAATACTACAGTGCAGAGATTCATGGCAGTTTCC  
BIG-ORF TTGCATCTTTGCGGAAGCAAACTCAATACTACAGTGCAGAGATTCATGGCAGTTTCC  
BIG-TAIR TTGCATCTTTGCGGAAGCAAACTCAATACTACAGTGCAGAGATTCATGGCAGTTTCC  
\*\*\*\*\*  
BIG-GENOME AATGAAGTAAAAACCTATACAAGCATGTTGAAAAGTCTGGTGGTTTGAAAACAATGTT  
BIG-ORF AATGAAGTAAAAACCTATACAAGCATGTTGAAAAGTCTGGTGGTTTGAAAACAATGTT  
BIG-TAIR AATGAAGTAAAAACCTATACAAGCATGTTGAAAAGTCTGGTGGTTTGAAAACAATGTT  
\*\*\*\*\*  
BIG-GENOME TCATATGAAAGAAGTGTAAGATTGTGAAGTCGCTTCTACAATTGCTGAAGTGCTGTG  
BIG-ORF TCATATGAAAGAAGTGTAAGATTGTGAAGTCGCTTCTACAATTGCTGAAGTGCTGTG  
BIG-TAIR TCATATGAAAGAAGTGTAAGATTGTGAAGTCGCTTCTACAATTGCTGAAGTGCTGTG  
\*\*\*\*\*  
BIG-GENOME GCAAGACCTCGGAACTGGCAGAAGTACTGTCTCAGGCATGGAGATTTCTGTCTTCCTA  
BIG-ORF GCAAGACCTCGGAACTGGCAGAAGTACTGTCTCAGGCATGGAGATTTCTGTCTTCCTA  
BIG-TAIR GCAAGACCTCGGAACTGGCAGAAGTACTGTCTCAGGCATGGAGATTTCTGTCTTCCTA  
\*\*\*\*\*  
BIG-GENOME CTGAATGGTGTATTCCATTTTGGCGAAGAGTCTGTAATCCAGACACTTAACTCCTCAAT  
BIG-ORF CTGAATGGTGTATTCCATTTTGGCGAAGAGTCTGTAATCCAGACACTTAACTCCTCAAT  
BIG-TAIR CTGAATGGTGTATTCCATTTTGGCGAAGAGTCTGTAATCCAGACACTTAACTCCTCAAT  
\*\*\*\*\*  
BIG-GENOME TTGGCCTTTTATCAAGGAAAAGATGTGAGCAGCTCAGTGCAGAAAGCTGAAGCAACTGAA  
BIG-ORF TTGGCCTTTTATCAAGGAAAAGATGTGAGCAGCTCAGTGCAGAAAGCTGAAGCAACTGAA  
BIG-TAIR TTGGCCTTTTATCAAGGAAAAGATGTGAGCAGCTCAGTGCAGAAAGCTGAAGCAACTGAA  
\*\*\*\*\*  
BIG-GENOME GTAGTGACAGGCTCAAACCGTCAGGATCTCAGTCAGTGGATTCAAAAAAGAAGAAAAA  
BIG-ORF GTAGTGACAGGCTCAAACCGTCAGGATCTCAGTCAGTGGATTCAAAAAAGAAGAAAAA  
BIG-TAIR GTAGTGACAGGCTCAAACCGTCAGGATCTCAGTCAGTGGATTCAAAAAAGAAGAAAAA  
\*\*\*\*\*  
BIG-GENOME GGTGAAGATGGGCATGATTCCGGTTTGAAAAAATTATATGTGGATATGGAAGGGTGGTC  
BIG-ORF GGTGAAGATGGGCATGATTCCGGTTTGAAAAAATTATATGTGGATATGGAAGGGTGGTC  
BIG-TAIR GGTGAAGATGGGCATGATTCCGGTTTGAAAAAATTATATGTGGATATGGAAGGGTGGTC  
\*\*\*\*\*  
BIG-GENOME GATATCTTCAGTGCCAATTGCGGAGATCTCTTGAGGCAGTTATTGATTCTTTCTGCTG  
BIG-ORF GATATCTTCAGTGCCAATTGCGGAGATCTCTTGAGGCAGTTATTGATTCTTTCTGCTG

BIG-TAIR GATATCTTCAGTGCCAATTGCGGAGATCTCTTGAGGCAGTTATTGATTTCTTTCTGCTG  
\*\*\*\*\*  
BIG-GENOME GAATGGAATTCGAGCTCTGTTCCGACTGAAGCAAAATCTGTTATTTATGGCTTGTGGCAT  
BIG-ORF GAATGGAATTCGAGCTCTGTTCCGACTGAAGCAAAATCTGTTATTTATGGCTTGTGGCAT  
BIG-TAIR GAATGGAATTCGAGCTCTGTTCCGACTGAAGCAAAATCTGTTATTTATGGCTTGTGGCAT  
\*\*\*\*\*  
BIG-GENOME CATGGAAGACTCGTTCAAAGAAAGTCTGTTAGCAGCTCTTTTGCAGAAGGTTAGATAC  
BIG-ORF CATGGAAGACTCGTTCAAAGAAAGTCTGTTAGCAGCTCTTTTGCAGAAGGTTAGATAC  
BIG-TAIR CATGGAAGACTCGTTCAAAGAAAGTCTGTTAGCAGCTCTTTTGCAGAAGGTTAGATAC  
\*\*\*\*\*  
BIG-GENOME CTGCCAGCATATGGTCAGAATATTGTTGAGTACACAGAACTTGTCCTTGTGCTTGAC  
BIG-ORF CTGCCAGCATATGGTCAGAATATTGTTGAGTACACAGAACTTGTCCTTGTGCTTGAC  
BIG-TAIR CTGCCAGCATATGGTCAGAATATTGTTGAGTACACAGAACTTGTCCTTGTGCTTGAC  
\*\*\*\*\*  
BIG-GENOME AAGGCTCCGAAAACAACTCAAAGCAAGCAATTAATGAGCTTGTGGATCGGTGCCTGAAC  
BIG-ORF AAGGCTCCGAAAACAACTCAAAGCAAGCAATTAATGAGCTTGTGGATCGGTGCCTGAAC  
BIG-TAIR AAGGCTCCGAAAACAACTCAAAGCAAGCAATTAATGAGCTTGTGGATCGGTGCCTGAAC  
\*\*\*\*\*  
BIG-GENOME CCTGATGTGATAAGGTGCTTTTTTGAGACGCTGCATTCCAGAACGAACCTATTGCCAAT  
BIG-ORF CCTGATGTGATAAGGTGCTTTTTGAGACGCTGCATTCCAGAACGAACCTATTGCCAAT  
BIG-TAIR CCTGATGTGATAAGGTGCTTTTTGAGACGCTGCATTCCAGAACGAACCTATTGCCAAT  
\*\*\*\*\*  
BIG-GENOME CATCCAACTCCCGTATATACAGCACTCTGGGTAATCTTGTGGAATTGATGGTTATTAT  
BIG-ORF CATCCAACTCCCGTATATACAGCACTCTGGGTAATCTTGTGGAATTGATGGTTATTAT  
BIG-TAIR CATCCAACTCCCGTATATACAGCACTCTGGGTAATCTTGTGGAATTGATGGTTATTAT  
\*\*\*\*\*  
BIG-GENOME CTTGAGAGCGAACCTTGTGTGCCTGCAGTTCTCCTGATGTGCCATATAGCAAAATGAAG  
BIG-ORF CTTGAGAGCGAACCTTGTGTGCCTGCAGTTCTCCTGATGTGCCATATAGCAAAATGAAG  
BIG-TAIR CTTGAGAGCGAACCTTGTGTGCCTGCAGTTCTCCTGATGTGCCATATAGCAAAATGAAG  
\*\*\*\*\*  
BIG-GENOME CTTGAAAGTTTGAATCCGAGACAAAGTTACTGATAACCGCATCATTGTGAAATGTACT  
BIG-ORF CTTGAAAGTTTGAATCCGAGACAAAGTTACTGATAACCGCATCATTGTGAAATGTACT  
BIG-TAIR CTTGAAAGTTTGAATCCGAGACAAAGTTACTGATAACCGCATCATTGTGAAATGTACT  
\*\*\*\*\*  
BIG-GENOME GGGAGTTATACGATACAGTCTGTGACAATGAATGTTTCATGATGCACGAAAGTCAAAGTCG  
BIG-ORF GGGAGTTATACGATACAGTCTGTGACAATGAATGTTTCATGATGCACGAAAGTCAAAGTCG  
BIG-TAIR GGGAGTTATACGATACAGTCTGTGACAATGAATGTTTCATGATGCACGAAAGTCAAAGTCG  
\*\*\*\*\*  
BIG-GENOME GTGAAGTCTTAACTTGTATTACAACAATCGCCCTGTCTCGGATTTATCAGAGCTTAAA  
BIG-ORF GTGAAGTCTTAACTTGTATTACAACAATCGCCCTGTCTCGGATTTATCAGAGCTTAAA  
BIG-TAIR GTGAAGTCTTAACTTGTATTACAACAATCGCCCTGTCTCGGATTTATCAGAGCTTAAA  
\*\*\*\*\*  
BIG-GENOME AACAACTGGTCACTGTGGAAGCGTGCCAAAAGTTGTCATCTGTCTTTAAACAACTGAA  
BIG-ORF AACAACTGGTCACTGTGGAAGCGTGCCAAAAGTTGTCATCTGTCTTTAAACAACTGAA

BIG-TAIR AACAACTGGTCACTGTGGAAGCGTGCCAAAAGTTGTCATCTGTCTTTAAACAACTGAA  
\*\*\*\*\*  
BIG-GENOME CTGAAGGTGGAATTCCTATTCTATTACTGCTTGAACCTCATGATCGAGTTGGATTCT  
BIG-ORF CTGAAGGTGGAATTCCTATTCTATTACTGCTTGAACCTCATGATCGAGTTGGATTCT  
BIG-TAIR CTGAAGGTGGAATTCCTATTCTATTACTGCTTGAACCTCATGATCGAGTTGGATTCT  
\*\*\*\*\*  
BIG-GENOME TTCTATGAGAATCTTCAGGCGTTATCTCTTGAACCATGCAATGCCTCGATGCAGCCGA  
BIG-ORF TTCTATGAGAATCTTCAGGCGTTATCTCTTGAACCATGCAATGCCTCGATGCAGCCGA  
BIG-TAIR TTCTATGAGAATCTTCAGGCGTTATCTCTTGAACCATGCAATGCCTCGATGCAGCCGA  
\*\*\*\*\*  
BIG-GENOME CCTGTCCTGATAAACAATGGTATTTGCAGCAACTGCCATGAGAATGCTTATCAGTGCAGG  
BIG-ORF CCTGTCCTGATAAACAATGGTATTTGCAGCAACTGCCATGAGAATGCTTATCAGTGCAGG  
BIG-TAIR CCTGTCCTGATAAACAATGGTATTTGCAGCAACTGCCATGAGAATGCTTATCAGTGCAGG  
\*\*\*\*\*  
BIG-GENOME CAATGCCGTAACATTAATTATGAAAATTTGGATTCAATCCTTTGCAACGAGTGTGGCTAC  
BIG-ORF CAATGCCGTAACATTAATTATGAAAATTTGGATTCAATCCTTTGCAACGAGTGTGGCTAC  
BIG-TAIR CAATGCCGTAACATTAATTATGAAAATTTGGATTCAATCCTTTGCAACGAGTGTGGCTAC  
\*\*\*\*\*  
BIG-GENOME AGCAAGTATGGGAGGTTTGAGTTAACTTCATGGCAAAACCAAGCTTCATATTTGATAAT  
BIG-ORF AGCAAGTATGGGAGGTTTGAGTTAACTTCATGGCAAAACCAAGCTTCATATTTGATAAT  
BIG-TAIR AGCAAGTATGGGAGGTTTGAGTTAACTTCATGGCAAAACCAAGCTTCATATTTGATAAT  
\*\*\*\*\*  
BIG-GENOME ATGGAAAATGACGAAGATATGAAGAAGGGATTGGCTGCTATAGAGTCTGAGTCTGAAAAC  
BIG-ORF ATGGAAAATGACGAAGATATGAAGAAGGGATTGGCTGCTATAGAGTCTGAGTCTGAAAAC  
BIG-TAIR ATGGAAAATGACGAAGATATGAAGAAGGGATTGGCTGCTATAGAGTCTGAGTCTGAAAAC  
\*\*\*\*\*  
BIG-GENOME GCTCACAAGAGATATCAGCAACTACTGGGATTAAGAAGCCGCTTCTGAAGATAGTTCA  
BIG-ORF GCTCACAAGAGATATCAGCAACTACTGGGATTAAGAAGCCGCTTCTGAAGATAGTTCA  
BIG-TAIR GCTCACAAGAGATATCAGCAACTACTGGGATTAAGAAGCCGCTTCTGAAGATAGTTCA  
\*\*\*\*\*  
BIG-GENOME AGCATTGGTGAAACTGAAATGGATTTCGAGCACAAGGACTGTCCAGCAAATGATGGCA  
BIG-ORF AGCATTGGTGAAACTGAAATGGATTTCGAGCACAAGGACTGTCCAGCAAATGATGGCA  
BIG-TAIR AGCATTGGTGAAACTGAAATGGATTTCGAGCACAAGGACTGTCCAGCAAATGATGGCA  
\*\*\*\*\*  
BIG-GENOME TCTTTACCTGGTCCATCATGCAAGATAAACC GAAAAATCGCACTTTTGGGCGTACTGTAT  
BIG-ORF TCTTTACCTGGTCCATCATGCAAGATAAACC GAAAAATCGCACTTTTGGGCGTACTGTAT  
BIG-TAIR TCTTTACCTGGTCCATCATGCAAGATAAACC GAAAAATCGCACTTTTGGGCGTACTGTAT  
\*\*\*\*\*  
BIG-GENOME GGTGAGAAGTCAAAGCTGCTTTTGATTCTGTCAGAAAAGTGTACAAACTGCAGGGG  
BIG-ORF GGTGAGAAGTCAAAGCTGCTTTTGATTCTGTCAGAAAAGTGTACAAACTGCAGGGG  
BIG-TAIR GGTGAGAAGTCAAAGCTGCTTTTGATTCTGTCAGAAAAGTGTACAAACTGCAGGGG  
\*\*\*\*\*  
BIG-GENOME CTTTCGTAGAGTTTGTAGAGCTACCTCCATCAGAAAAATCAAATTTTCATCAGGTGCC  
BIG-ORF CTTTCGTAGAGTTTGTAGAGCTACCTCCATCAGAAAAATCAAATTTTCATCAGGTGCC

BIG-TAIR CTTCTGATAGATTTTGTAGAGCTACCTCCATCAGAAAAATTCAAATTTTTCATCAGGTGCC  
\*\*\*\*\*  
BIG-GENOME TCAAGATGTGTGGTCTCAAAGACCCCAAACAATTGTTATGGTTGTGCAACTACATTGTC  
BIG-ORF TCAAGATGTGTGGTCTCAAAGACCCCAAACAATTGTTATGGTTGTGCAACTACATTGTC  
BIG-TAIR TCAAGATGTGTGGTCTCAAAGACCCCAAACAATTGTTATGGTTGTGCAACTACATTGTC  
\*\*\*\*\*  
BIG-GENOME ACTCAATGTCTTGAGATTCTTCAAGTGCTGTCGAAGCATCCAAGATCTAGAAAACAACT  
BIG-ORF ACTCAATGTCTTGAGATTCTTCAAGTGCTGTCGAAGCATCCAAGATCTAGAAAACAACT  
BIG-TAIR ACTCAATGTCTTGAGATTCTTCAAGTGCTGTCGAAGCATCCAAGATCTAGAAAACAACT  
\*\*\*\*\*  
BIG-GENOME GTTGACAGCTGGTATTTGTCTGAGTTGTTGAAAAACAATATTCACCAAGGTCCGAAAACA  
BIG-ORF GTTGACAGCTGGTATTTGTCTGAGTTGTTGAAAAACAATATTCACCAAGGTCCGAAAACA  
BIG-TAIR GTTGACAGCTGGTATTTGTCTGAGTTGTTGAAAAACAATATTCACCAAGGTCCGAAAACA  
\*\*\*\*\*  
BIG-GENOME GCCCGTGCTCAAGCTAGAGCAGCTCTTCTACTTTCTCGGAGGGTGATCTGAGTGCAGTG  
BIG-ORF GCCCGTGCTCAAGCTAGAGCAGCTCTTCTACTTTCTCGGAGGGTGATCTGAGTGCAGTG  
BIG-TAIR GCCCGTGCTCAAGCTAGAGCAGCTCTTCTACTTTCTCGGAGGGTGATCTGAGTGCAGTG  
\*\*\*\*\*  
BIG-GENOME AATGAGTTAAACAATCTGGTACAGAAGAAAATAATGACTGCCTTGAACACCATCGTTCC  
BIG-ORF AATGAGTTAAACAATCTGGTACAGAAGAAAATAATGACTGCCTTGAACACCATCGTTCC  
BIG-TAIR AATGAGTTAAACAATCTGGTACAGAAGAAAATAATGACTGCCTTGAACACCATCGTTCC  
\*\*\*\*\*  
BIG-GENOME ATGGATATTGCGCTCGCCACTCGTGAGGAAATGTTGTTGCTTTCAGAAGTTGCTCTCTC  
BIG-ORF ATGGATATTGCGCTCGCCACTCGTGAGGAAATGTTGTTGCTTTCAGAAGTTGCTCTCTC  
BIG-TAIR ATGGATATTGCGCTCGCCACTCGTGAGGAAATGTTGTTGCTTTCAGAAGTTGCTCTCTC  
\*\*\*\*\*  
BIG-GENOME ACTGATGAATTCTGGGAGTCAAGACTGCGCCTTGTTTTTCAGCTACTATTTTCATCCATT  
BIG-ORF ACTGATGAATTCTGGGAGTCAAGACTGCGCCTTGTTTTTCAGCTACTATTTTCATCCATT  
BIG-TAIR ACTGATGAATTCTGGGAGTCAAGACTGCGCCTTGTTTTTCAGCTACTATTTTCATCCATT  
\*\*\*\*\*  
BIG-GENOME AAATGGGTGCTAAACATCCTGCTATATCAGAGCACATAATTCTTCCTTGCCCTAAGATT  
BIG-ORF AAATGGGTGCTAAACATCCTGCTATATCAGAGCACATAATTCTTCCTTGCCCTAAGATT  
BIG-TAIR AAATGGGTGCTAAACATCCTGCTATATCAGAGCACATAATTCTTCCTTGCCCTAAGATT  
\*\*\*\*\*  
BIG-GENOME ATTTCTGTGGCATGTACACCTCCTAAACCAGATACGGCAGAGAAAGAGCAAACGATGGGA  
BIG-ORF ATTTCTGTGGCATGTACACCTCCTAAACCAGATACGGCAGAGAAAGAGCAAACGATGGGA  
BIG-TAIR ATTTCTGTGGCATGTACACCTCCTAAACCAGATACGGCAGAGAAAGAGCAAACGATGGGA  
\*\*\*\*\*  
BIG-GENOME AAATCTGCTCCTGCAGTGAAGAAAAGGATGAGAATGCTGCTGGCGTCATAAAGTATTCA  
BIG-ORF AAATCTGCTCCTGCAGTGAAGAAAAGGATGAGAATGCTGCTGGCGTCATAAAGTATTCA  
BIG-TAIR AAATCTGCTCCTGCAGTGAAGAAAAGGATGAGAATGCTGCTGGCGTCATAAAGTATTCA  
\*\*\*\*\*  
BIG-GENOME TCAGAAAGCGAAGAAAATAACCTGAATGTATCTCAGAAGACGCGAGATATTCAGCTTGTG  
BIG-ORF TCAGAAAGCGAAGAAAATAACCTGAATGTATCTCAGAAGACGCGAGATATTCAGCTTGTG

BIG-TAIR TCAGAAAGCGAAGAAAATAACCTGAATGTATCTCAGAAGACGCGAGATATTCAGCTTGTG  
 \*\*\*\*\*

BIG-GENOME AGTTATTTGGAATGGGAGAAAGGGGCATCATATCTCGACTTTGTGAGGAGGCAATACAAA  
 BIG-ORF AGTTATTTGGAATGGGAGAAAGGGGCATCATATCTCGACTTTGTGAGGAGGCAATACAAA  
 BIG-TAIR AGTTATTTGGAATGGGAGAAAGGGGCATCATATCTCGACTTTGTGAGGAGGCAATACAAA  
 \*\*\*\*\*

BIG-GENOME GCCTCTCAGTCAATTAGAGGTGCGAGCCAAAAGTCTAGAACCCACAGATCAGATTCTTG  
 BIG-ORF GCCTCTCAGTCAATTAGAGGTGCGAGCCAAAAGTCTAGAACCCACAGATCAGATTCTTG  
 BIG-TAIR GCCTCTCAGTCAATTAGAGGTGCGAGCCAAAAGTCTAGAACCCACAGATCAGATTCTTG  
 \*\*\*\*\*

BIG-GENOME GCACCTAAATATACACTTAGGTGGAAGCGACGGTCTAGCAGGACATCTAAAGGTGGTTA  
 BIG-ORF GCACCTAAATATACACTTAGGTGGAAGCGACGGTCTAGCAGGACATCTAAAGGTGGTTA  
 BIG-TAIR GCACCTAAATATACACTTAGGTGGAAGCGACGGTCTAGCAGGACATCTAAAGGTGGTTA  
 \*\*\*\*\*

BIG-GENOME CAGGCATTTGAGCTCGGGTCGTGGGTCACAGAGCTTATCTTAGTGCATGTTCTCAATCT  
 BIG-ORF CAGGCATTTGAGCTCGGGTCGTGGGTCACAGAGCTTATCTTAGTGCATGTTCTCAATCT  
 BIG-TAIR CAGGCATTTGAGCTCGGGTCGTGGGTCACAGAGCTTATCTTAGTGCATGTTCTCAATCT  
 \*\*\*\*\*

BIG-GENOME ATCAGGTCGGAGATGTGCACATTGATTAGTTTACTCGCTGCCAAAGCTCACCTAGGCGC  
 BIG-ORF ATCAGGTCGGAGATGTGCACATTGATTAGTTTACTCGCTGCCAAAGCTCACCTAGGCGC  
 BIG-TAIR ATCAGGTCGGAGATGTGCACATTGATTAGTTTACTCGCTGCCAAAGCTCACCTAGGCGC  
 \*\*\*\*\*

BIG-GENOME TACAGGCTGATTAATTGCTGATAGGCTTGCTTCCCGCTACGCTTGCAGCGGGTAAAAGT  
 BIG-ORF TACAGGCTGATTAATTGCTGATAGGCTTGCTTCCCGCTACGCTTGCAGCGGGTAAAAGT  
 BIG-TAIR TACAGGCTGATTAATTGCTGATAGGCTTGCTTCCCGCTACGCTTGCAGCGGGTAAAAGT  
 \*\*\*\*\*

BIG-GENOME AGCGCAGAATACTTTGAGCTACTCTTCAAAATGATTGAGACACAAGATGCACTTCTTTTC  
 BIG-ORF AGCGCAGAATACTTTGAGCTACTCTTCAAAATGATTGAGACACAAGATGCACTTCTTTTC  
 BIG-TAIR AGCGCAGAATACTTTGAGCTACTCTTCAAAATGATTGAGACACAAGATGCACTTCTTTTC  
 \*\*\*\*\*

BIG-GENOME TTAAGTGTCCGGGGTTGTCTGACAACAATCTGTAATTTGATCTCCAAGAGGTGGGAAAC  
 BIG-ORF TTAAGTGTCCGGGGTTGTCTGACAACAATCTGTAATTTGATCTCCAAGAGGTGGGAAAC  
 BIG-TAIR TTAAGTGTCCGGGGTTGTCTGACAACAATCTGTAATTTGATCTCCAAGAGGTGGGAAAC  
 \*\*\*\*\*

BIG-GENOME ATTGAATCTCTAGAAAGGAGTCTTCAGATTGACATTTACAGGGATTACCCTCCACAAG  
 BIG-ORF ATTGAATCTCTAGAAAGGAGTCTTCAGATTGACATTTACAGGGATTACCCTCCACAAG  
 BIG-TAIR ATTGAATCTCTAGAAAGGAGTCTTCAGATTGACATTTACAGGGATTACCCTCCACAAG  
 \*\*\*\*\*

BIG-GENOME CTCTTAGAACTCCTTGAAAAGTTCTTAGAGGTCCAAATATTCGTTCCAGGTAATTTCT  
 BIG-ORF CTCTTAGAACTCCTTGAAAAGTTCTTAGAGGTCCAAATATTCGTTCCAG-----  
 BIG-TAIR CTCTTAGAACTCCTTGAAAAGTTCTTAGAGGTCCAAATATTCGTTCCAG-----  
 \*\*\*\*\*

BIG-GENOME CATCATAAATCTATTGATCTGCCATTGACTTCTCATACCTGTCTAATGTTTGGAGTGT  
 BIG-ORF -----

|            |                                                                       |
|------------|-----------------------------------------------------------------------|
| BIG-TAIR   | -----                                                                 |
| BIG-GENOME | GGCAGATTCATGAGAGACAATTTACTGTCTCATGTTCTGGAGGCCCTCATTGTAATTCGT          |
| BIG-ORF    | ----ATTCATGAGAGACAATTTACTGTCTCATGTTCTGGAGGCCCTCATTGTAATTCGT           |
| BIG-TAIR   | ----ATTCATGAGAGACAATTTACTGTCTCATGTTCTGGAGGCCCTCATTGTAATTCGT<br>*****  |
| BIG-GENOME | GGCTTGATAGTGCAAAAGACAAAGCTTATAAATGATTGCAACAGACGCCTAAAAGATCTT          |
| BIG-ORF    | GGCTTGATAGTGCAAAAGACAAAGCTTATAAATGATTGCAACAGACGCCTAAAAGATCTT          |
| BIG-TAIR   | GGCTTGATAGTGCAAAAGACAAAGCTTATAAATGATTGCAACAGACGCCTAAAAGATCTT<br>***** |
| BIG-GENOME | CTTGACGGACTTCTGCTTGAAGCAGTAAAATAAACGTCAATTTATCCGTGCCTGTGTT            |
| BIG-ORF    | CTTGACGGACTTCTGCTTGAAGCAGTAAAATAAACGTCAATTTATCCGTGCCTGTGTT            |
| BIG-TAIR   | CTTGACGGACTTCTGCTTGAAGCAGTAAAATAAACGTCAATTTATCCGTGCCTGTGTT<br>*****   |
| BIG-GENOME | TCTGGACTGCAAACCCATGCAGAGGAGAACAAGGACGTACCTGTTTGGTAAGAAGAATT           |
| BIG-ORF    | TCTGGACTGCAAACCCATGCAGAGGAGAACAAGGACGTACCTGTTG-----                   |
| BIG-TAIR   | TCTGGACTGCAAACCCATGCAGAGGAGAACAAGGACGTACCTGTTG-----<br>*****          |
| BIG-GENOME | ATCATACTGACCACTGTATCATCTTCAAATATATGATTCTTTATTACTTTACAGTCTCT           |
| BIG-ORF    | -----                                                                 |
| BIG-TAIR   | -----                                                                 |
| BIG-GENOME | GGGGATCTTCTATCTCTTTTTAGACTTCTGGATGAAAATATTATATACACTTAGTTTG            |
| BIG-ORF    | -----                                                                 |
| BIG-TAIR   | -----                                                                 |
| BIG-GENOME | AGTATTAGGAGTATTTGAACAGTCTATATATAGCTGATATCCTTCCTAACTTTATATCC           |
| BIG-ORF    | -----                                                                 |
| BIG-TAIR   | -----                                                                 |
| BIG-GENOME | TAGATTCAGTTGACATATATCCTTGACTTGTTTGTGATTCATTCAATTGCATATGCAG            |
| BIG-ORF    | -----                                                                 |
| BIG-TAIR   | -----                                                                 |
| BIG-GENOME | TTTATTCTTGAGCAACTTTGTAATCTGATCTGCCGTCAAACCTGAGGCTGTGTATATG            |
| BIG-ORF    | TTTATTCTTGAGCAACTTTGTAATCTGATCTGCCGTCAAACCTGAGGCTGTGTATATG            |
| BIG-TAIR   | TTTATTCTTGAGCAACTTTGTAATCTGATCTGCCGTCAAACCTGAGGCTGTGTATATG<br>*****   |
| BIG-GENOME | CTGATCTTGAACAAATCACACAGCAAGAGGAGTTATCCGGGATCAATGACAAAAAAT             |
| BIG-ORF    | CTGATCTTGAACAAATCACACAGCAAGAGGAGTTATCCGGGATCAATGACAAAAAAT             |
| BIG-TAIR   | CTGATCTTGAACAAATCACACAGCAAGAGGAGTTATCCGGGATCAATGACAAAAAAT<br>*****    |
| BIG-GENOME | CCATATTCGAGTGTGAGATTGGCCCACTGATGCGGGATGTGAAAAACAAGATTTGTCAG           |
| BIG-ORF    | CCATATTCGAGTGTGAGATTGGCCCACTGATGCGGGATGTGAAAAACAAGATTTGTCAG           |

BIG-TAIR CCATATTCGAGTGCTGAGATTGGCCCACTGATGCGGGATGTGAAAAACAAGATTGTCTAG  
 \*\*\*\*\*  
 BIG-GENOME CAGTTGGACCTGCTAGGTCTACTGGAAGATGACTATGGCATGGAGTTGCTTGTAGCAGGA  
 BIG-ORF CAGTTGGACCTGCTAGGTCTACTGGAAGATGACTATGGCATGGAGTTGCTTGTAGCAGGA  
 BIG-TAIR CAGTTGGACCTGCTAGGTCTACTGGAAGATGACTATGGCATGGAGTTGCTTGTAGCAGGA  
 \*\*\*\*\*  
 BIG-GENOME AACATCATTCTACTAGACCTGAGCATAGCTCAAGTTTATGAGCTAGTTTGAAGAAATCA  
 BIG-ORF AACATCATTCTACTAGACCTGAGCATAGCTCAAGTTTATGAGCTAGTTTGAAGAAATCA  
 BIG-TAIR AACATCATTCTACTAGACCTGAGCATAGCTCAAGTTTATGAGCTAGTTTGAAGAAATCA  
 \*\*\*\*\*  
 BIG-GENOME AATCAGTCTTCTACTTCACTGACCAACTCCGCACTGTTAGCTTCAAATGCAGCTCCCAGC  
 BIG-ORF AATCAGTCTTCTACTTCACTGACCAACTCCGCACTGTTAGCTTCAAATGCAGCTCCCAGC  
 BIG-TAIR AATCAGTCTTCTACTTCACTGACCAACTCCGCACTGTTAGCTTCAAATGCAGCTCCCAGC  
 \*\*\*\*\*  
 BIG-GENOME AGGGATTGCCCTCCCATGACGGTGACATACAGACTTCAGGTTGTGACGCTTTCTAGTG  
 BIG-ORF AGGGATTGCCCTCCCATGACGGTGACATACAGACTTCAG-----  
 BIG-TAIR AGGGATTGCCCTCCCATGACGGTGACATACAGACTTCAG-----  
 \*\*\*\*\*  
 BIG-GENOME AAGTACTAGGCCAAAGATGGGTTTTGCTCGCCTTACTTATTGTTTTGATAAAAGCGGC  
 BIG-ORF -----  
 BIG-TAIR -----  
 \*\*\*\*\*  
 BIG-GENOME AAATTCATACAATATTGTGTGGTTAAAAATTTGGCAGGGTTAGATGGTGAAGCTACTGA  
 BIG-ORF -----GGTTAGATGGTGAAGCTACTGA  
 BIG-TAIR -----GGTTAGATGGTGAAGCTACTGA  
 \*\*\*\*\*  
 BIG-GENOME GCCTATGATCAAGGAATTGGAAGAAGATAGAGAAGAATCACAAGATCCAGAGATTGAGTT  
 BIG-ORF GCCTATGATCAAGGAATTGGAAGAAGATAGAGAAGAATCACAAGATCCAGAGATTGAGTT  
 BIG-TAIR GCCTATGATCAAGGAATTGGAAGAAGATAGAGAAGAATCACAAGATCCAGAGATTGAGTT  
 \*\*\*\*\*  
 BIG-GENOME TGCAATAGCAGGTGCAGTTCGAGAATATGGTGGTCTGGAAATTTACTTGATATGATCAA  
 BIG-ORF TGCAATAGCAGGTGCAGTTCGAGAATATGGTGGTCTGGAAATTTACTTGATATGATCAA  
 BIG-TAIR TGCAATAGCAGGTGCAGTTCGAGAATATGGTGGTCTGGAAATTTACTTGATATGATCAA  
 \*\*\*\*\*  
 BIG-GENOME GGTAAGGATCTTAAACTATCAATGGGAAACTGAGATTCTCTCCTAGGCTCTTAGGCACTT  
 BIG-ORF G-----  
 BIG-TAIR G-----  
 \*  
 BIG-GENOME TTCGATACATTGAAGGAGCGTAAAAGAAGAATAATTATAATACCAAAGTAGCTTATTA  
 BIG-ORF -----  
 BIG-TAIR -----  
 \*\*\*\*\*  
 BIG-GENOME ACATGTAATGTATTCCCTATGCAGAGTTTACAAGATGACTTCAAATCCAACCAAGAAGAGA  
 BIG-ORF -----AGTTTACAAGATGACTTCAAATCCAACCAAGAAGAGA

```

BIG-TAIR      -----AGTTTACAAGATGACTTCAAATCCAACCAAGAAGAGA
                *****
BIG-GENOME    TGGTTGCAGTTC TTGATCTCTAAACCATTGCTGCAAGATTAGAGAGAACAGGCGAGCTC
BIG-ORF       TGGTTGCAGTTC TTGATCTCTAAACCATTGCTGCAAGATTAGAGAGAACAGGCGAGCTC
BIG-TAIR      TGGTTGCAGTTC TTGATCTCTAAACCATTGCTGCAAGATTAGAGAGAACAGGCGAGCTC
                *****
BIG-GENOME    TACTCAGGCTAGGGGCTTAAAGCTTACTTCTTGAAACAGCTAGGAGGGCATTCTGTGG
BIG-ORF       TACTCAGGCTAGGGGCTTAAAGCTTACTTCTTGAAACAGCTAGGAGGGCATTCTGTGG
BIG-TAIR      TACTCAGGCTAGGGGCTTAAAGCTTACTTCTTGAAACAGCTAGGAGGGCATTCTGTGG
                *****
BIG-GENOME    ATGCTATGGAGCCAGCTGAAGGCATACTCTAATTGTCGAGAGTTTGACGCTTGAAGCAA
BIG-ORF       ATGCTATGGAGCCAGCTGAAGGCATACTCTAATTGTCGAGAGTTTGACGCTTGAAGCAA
BIG-TAIR      ATGCTATGGAGCCAGCTGAAGGCATACTCTAATTGTCGAGAGTTTGACGCTTGAAGCAA
                *****
BIG-GENOME    ATGAAAGTGACAGCATCAGTGCCGCACAAAGTGCTTTGACTGTCAGTAACGAGGAACTG
BIG-ORF       ATGAAAGTGACAGCATCAGTGCCGCACAAAGTGCTTTGACTGTCAGTAACGAGGAACTG
BIG-TAIR      ATGAAAGTGACAGCATCAGTGCCGCACAAAGTGCTTTGACTGTCAGTAACGAGGAACTG
                *****
BIG-GENOME    GAACTTGGGAACAGGCCAAAAAATAGTGCTTATGTTCTTAGAAAGGCTAAGCCATCCTT
BIG-ORF       GAACTTGGGAACAGGCCAAAAAATAGTGCTTATGTTCTTAGAAAGGCTAAGCCATCCTT
BIG-TAIR      GAACTTGGGAACAGGCCAAAAAATAGTGCTTATGTTCTTAGAAAGGCTAAGCCATCCTT
                *****
BIG-GENOME    CAGGGCTTAAAAAGTCAAACAAACAGCAAAGGAACACGGAGATGGTTGCTAGAATCTTAC
BIG-ORF       CAGGGCTTAAAAAGTCAAACAAACAGCAAAGGAACACGGAGATGGTTGCTAGAATCTTAC
BIG-TAIR      CAGGGCTTAAAAAGTCAAACAAACAGCAAAGGAACACGGAGATGGTTGCTAGAATCTTAC
                *****
BIG-GENOME    CTTACTTAACATACGGTGAGCCTGCAGCGATGGAAGCACTCATAGAGCATTTAGCCCTT
BIG-ORF       CTTACTTAACATACGGTGAGCCTGCAGCGATGGAAGCACTCATAGAGCATTTAGCCCTT
BIG-TAIR      CTTACTTAACATACGGTGAGCCTGCAGCGATGGAAGCACTCATAGAGCATTTAGCCCTT
                *****
BIG-GENOME    ACCTGCAAACTGGTCTGAATTTGATCAGCTTCAGCAACGTCATGAGGAGACCCCAAGG
BIG-ORF       ACCTGCAAACTGGTCTGAATTTGATCAGCTTCAGCAACGTCATGAGGAGACCCCAAGG
BIG-TAIR      ACCTGCAAACTGGTCTGAATTTGATCAGCTTCAGCAACGTCATGAGGAGACCCCAAGG
                *****
BIG-GENOME    ATGACAGCATTGCTCAGCAAGCGGCGAAGCAGAGGTTACTGTGGAGAATTTGTAAGAG
BIG-ORF       ATGACAGCATTGCTCAGCAAGCGGCGAAGCAGAGGTTACTGTGGAGAATTTGTAAGAG
BIG-TAIR      ATGACAGCATTGCTCAGCAAGCGGCGAAGCAGAGGTTACTGTGGAGAATTTGTAAGAG
                *****
BIG-GENOME    TGTGAGAATCTCTCAAGACAAGTTCATGTGGAGAGAGGTTAAAAGACATAGTTTGAGA
BIG-ORF       TGTGAGAATCTCTCAAGACAAGTTCATGTGGAGAGAGGTTAAAAGACATAGTTTGAGA
BIG-TAIR      TGTGAGAATCTCTCAAGACAAGTTCATGTGGAGAGAGGTTAAAAGACATAGTTTGAGA
                *****
BIG-GENOME    ATGGTATCATAGCTGTGCTGTCAAACACATAAAGGAAATTTTGCAATCACGGGACAGA
BIG-ORF       ATGGTATCATAGCTGTGCTGTCAAACACATAAAGGAAATTTTGCAATCACGGGACAGA

```



BIG-TAIR ATGGTATCATAGCTGTGCTGCTCAAACACATAAAGGAAATTTTGAATCACGGGACAGA  
 \*\*\*\*\*  
 BIG-GENOME CTGGTTCAAATCTAGCAAGGAATGGCTTTGGCTCTTAAACTCCGTCAGTGCCTCTTA  
 BIG-ORF CTGGTTCAAATCTAGCAAGGAATGGCTTTGGCTCTTAAACTCCGTCAGTGCCTCTTA  
 BIG-TAIR CTGGTTCAAATCTAGCAAGGAATGGCTTTGGCTCTTAAACTCCGTCAGTGCCTCTTA  
 \*\*\*\*\*  
 BIG-GENOME TTTTGTCAATGCTAAGAGGATTGTCGATGGGTCATTTGCCTACCCAAACATGCATAGACG  
 BIG-ORF TTTTGTCAATGCTAAGAGGATTGTCGATGGGTCATTTGCCTACCCAAACATGCATAGACG  
 BIG-TAIR TTTTGTCAATGCTAAGAGGATTGTCGATGGGTCATTTGCCTACCCAAACATGCATAGACG  
 \*\*\*\*\*  
 BIG-GENOME AGGGAGGAATTTTAACCCCTACTTCATGCCTTAGAAGGAGTCTCTGGAGAAAACGACATCG  
 BIG-ORF AGGGAGGAATTTTAACCCCTACTTCATGCCTTAGAAGGAGTCTCTGGAGAAAACGACATCG  
 BIG-TAIR AGGGAGGAATTTTAACCCCTACTTCATGCCTTAGAAGGAGTCTCTGGAGAAAACGACATCG  
 \*\*\*\*\*  
 BIG-GENOME GTGCAAGGGCTGAAAATTTGCTAGATACACTTGCCGATAAAGAAGGAAAAGGAGATGGAT  
 BIG-ORF GTGCAAGGGCTGAAAATTTGCTAGATACACTTGCCGATAAAGAAGGAAAAGGAGATGGAT  
 BIG-TAIR GTGCAAGGGCTGAAAATTTGCTAGATACACTTGCCGATAAAGAAGGAAAAGGAGATGGAT  
 \*\*\*\*\*  
 BIG-GENOME TTCTTGAGAGAAAAGTCCGTGCATTACGAGATGCCACCAAAGATGAAATGAGACGCCGTG  
 BIG-ORF TTCTTGAGAGAAAAGTCCGTGCATTACGAGATGCCACCAAAGATGAAATGAGACGCCGTG  
 BIG-TAIR TTCTTGAGAGAAAAGTCCGTGCATTACGAGATGCCACCAAAGATGAAATGAGACGCCGTG  
 \*\*\*\*\*  
 BIG-GENOME CATTAAGAAAGAGAGAGGAGCTCCTGCAGGTAATAATAATGATTCTCTCAAGGAA  
 BIG-ORF CATTAAGAAAGAGAGAGGAGCTCCTGCAG-----  
 BIG-TAIR CATTAAGAAAGAGAGAGGAGCTCCTGCAG-----  
 \*\*\*\*\*  
 BIG-GENOME ACTAAATGTGTAATTTGGTCTTGTGACAATATTTACCAAGTTTCTCTTTGAAACAGGGA  
 BIG-ORF -----GGA  
 BIG-TAIR -----GGA  
 \*\*\*  
 BIG-GENOME CTTGGAATGCGTCAAGAGCTATCTTCTGATGGTGGTAAAAGGATTGTGGTTTCTCAACCA  
 BIG-ORF CTTGGAATGCGTCAAGAGCTATCTTCTGATGGTGGTAAAAGGATTGTGGTTTCTCAACCA  
 BIG-TAIR CTTGGAATGCGTCAAGAGCTATCTTCTGATGGTGGTAAAAGGATTGTGGTTTCTCAACCA  
 \*\*\*\*\*  
 BIG-GENOME ATTCTTGAAGGTTTTGAGGATGTAGAGGAAGAAGAAGATGGATTGGCTTGCATGGTGTGT  
 BIG-ORF ATTCTTGAAGGTTTTGAGGATGTAGAGGAAGAAGAAGATGGATTGGCTTGCATGGTGTGT  
 BIG-TAIR ATTCTTGAAGGTTTTGAGGATGTAGAGGAAGAAGAAGATGGATTGGCTTGCATGGTGTGT  
 \*\*\*\*\*  
 BIG-GENOME AGAGAAGGCTACAAGCTCAGACCTTCTGATTTATTAGGAGTCTACTTTACAGCAAACGG  
 BIG-ORF AGAGAAGGCTACAAGCTCAGACCTTCTGATTTATTAGGAGTCTACTTTACAGCAAACGG  
 BIG-TAIR AGAGAAGGCTACAAGCTCAGACCTTCTGATTTATTAGGAGTCTACTTTACAGCAAACGG  
 \*\*\*\*\*  
 BIG-GENOME GTGAATCTCGGTGTTGGCAATTCTGGAAGCGCACGTGGTGAATGCGTTTACACTACAGTG  
 BIG-ORF GTGAATCTCGGTGTTGGCAATTCTGGAAGCGCACGTGGTGAATGCGTTTACACTACAGTG

```

BIG-TAIR      GTGAATCTCGGTGTTGGCAATTCTGGAAGCGCACGTGGTGAATGCGTTTACACTACAGTG
                *****
BIG-GENOME    AGCTACTTCAACATAATTCATTTTCAATGTCATCAAGAGGCAAAAAGAGCCGACGCTGCT
BIG-ORF       AGCTACTTCAACATAATTCATTTTCAATGTCATCAAGAGGCAAAAAGAGCCGACGCTGCT
BIG-TAIR      AGCTACTTCAACATAATTCATTTTCAATGTCATCAAGAGGCAAAAAGAGCCGACGCTGCT
                *****
BIG-GENOME    CTTAAAAATCCGAAGAAGAATGGGAAGGAGCTATGTTGCGTAACAATGAATCTCTTTGC
BIG-ORF       CTTAAAAATCCGAAGAAGAATGGGAAGGAGCTATGTTGCGTAACAATGAATCTCTTTGC
BIG-TAIR      CTTAAAAATCCGAAGAAGAATGGGAAGGAGCTATGTTGCGTAACAATGAATCTCTTTGC
                *****
BIG-GENOME    AACTCTCTCTCCCTGTCAAGGGTCCCTCAGTCCCTTAGCACAGTATCTTCGTTACGTT
BIG-ORF       AACTCTCTCTCCCTGTCAAGGGTCCCTCAGTCCCTTAGCACAGTATCTTCGTTACGTT
BIG-TAIR      AACTCTCTCTCCCTGTCAAGGGTCCCTCAGTCCCTTAGCACAGTATCTTCGTTACGTT
                *****
BIG-GENOME    GACCAGTACTGGGATAATCTCAATGCTCTTGGTCGAGCCGACGGAAGCAGACTCCGTCTA
BIG-ORF       GACCAGTACTGGGATAATCTCAATGCTCTTGGTCGAGCCGACGGAAGCAGACTCCGTCTA
BIG-TAIR      GACCAGTACTGGGATAATCTCAATGCTCTTGGTCGAGCCGACGGAAGCAGACTCCGTCTA
                *****
BIG-GENOME    TTGACGTACGACATTGTCCTGGTAAGTAAAAATTGGTCTGAAACTTACTAGGTGTTGG
BIG-ORF       TTGACGTACGACATTGTCCTG-----
BIG-TAIR      TTGACGTACGACATTGTCCTG-----
                *****
BIG-GENOME    CCTTCGGTTCAATGGCAGTTGGTAAAAAGTGTCAATTCGGTTTGGTTTAAACTTGAT
BIG-ORF       -----
BIG-TAIR      -----

BIG-GENOME    CGGGACTTGATTCCAACAGCTAATCAAGTGGCTCTGTGATTTTCGTTTCGGATTACCA
BIG-ORF       -----
BIG-TAIR      -----

BIG-GENOME    AGTGATTCACTGACAACFTTTGTTTCATCTGTAGATGCTGGCTCGGTTTGCAACAGGAGC
BIG-ORF       -----ATGCTGGCTCGGTTTGCAACAGGAGC
BIG-TAIR      -----ATGCTGGCTCGGTTTGCAACAGGAGC
                *****
BIG-GENOME    TTCTTTTAGCGCGGATTGCCGAGGTGGAGGAAGAGATAGCAATCCCGTTTCTTGCCTTT
BIG-ORF       TTCTTTTAGCGCGGATTGCCGAGGTGGAGGAAGAGATAGCAATCCCGTTTCTTGCCTTT
BIG-TAIR      TTCTTTTAGCGCGGATTGCCGAGGTGGAGGAAGAGATAGCAATCCCGTTTCTTGCCTTT
                *****
BIG-GENOME    CATGTTCCAATGGCCGTCATCTTCTCGACCAAGGAGGCCCGTGCAACGCACAAACAT
BIG-ORF       CATGTTCCAATGGCCGTCATCTTCTCGACCAAGGAGGCCCGTGCAACGCACAAACAT
BIG-TAIR      CATGTTCCAATGGCCGTCATCTTCTCGACCAAGGAGGCCCGTGCAACGCACAAACAT
                *****
BIG-GENOME    GGCTAGATCTGTTTCATCGTACATTTTCATCATCATCGACATCTACAGCAACAGCGCCATC
BIG-ORF       GGCTAGATCTGTTTCATCGTACATTTTCATCATCATCGACATCTACAGCAACAGCGCCATC

```

BIG-TAIR GGCTAGATCTGTTTCATCGTACATTTTCATCATCATCGACATCTACAGCAACAGGCCATC  
 \*\*\*\*\*

BIG-GENOME CTCGGACTCGCGACCTTTAACTCCTGGATCCCAGCTATCATCAACTGGAACAGAGGAAAC  
 BIG-ORF CTCGGACTCGCGACCTTTAACTCCTGGATCCCAGCTATCATCAACTGGAACAGAGGAAAC  
 BIG-TAIR CTCGGACTCGCGACCTTTAACTCCTGGATCCCAGCTATCATCAACTGGAACAGAGGAAAC  
 \*\*\*\*\*

BIG-GENOME GGTTCAGTTCATGATGGTAAACTCGCTTCTATCAGAATCATATGAATCATGGCTCCAACA  
 BIG-ORF GGTTCAGTTCATGATGGTAAACTCGCTTCTATCAGAATCATATGAATCATGGCTCCAACA  
 BIG-TAIR GGTTCAGTTCATGATGGTAAACTCGCTTCTATCAGAATCATATGAATCATGGCTCCAACA  
 \*\*\*\*\*

BIG-GENOME CCGTAGGTCTTTCTCCAGCGGGGATTACCATACTTTCATGCAACACGCTCACGGTCG  
 BIG-ORF CCGTAGGTCTTTCTCCAGCGGGGATTACCATACTTTCATGCAACACGCTCACGGTCG  
 BIG-TAIR CCGTAGGTCTTTCTCCAGCGGGGATTACCATACTTTCATGCAACACGCTCACGGTCG  
 \*\*\*\*\*

BIG-GENOME GGTAGTCTTCGCGCTGCAGAACAACCAGTTCAGGAGGCAAAACCAAGACGAGAAAC  
 BIG-ORF GGTAGTCTTCGCGCTGCAGAACAACCAGTTCAGGAGGCAAAACCAAGACGAGAAAC  
 BIG-TAIR GGTAGTCTTCGCGCTGCAGAACAACCAGTTCAGGAGGCAAAACCAAGACGAGAAAC  
 \*\*\*\*\*

BIG-GENOME CTTAACCGCGATGAACTTCTCTATCGTCAAACCAATGCTGGTCTACACCGGTATGAT  
 BIG-ORF CTTAACCGCGATGAACTTCTCTATCGTCAAACCAATGCTGGTCTACACCGGTATGAT  
 BIG-TAIR CTTAACCGCGATGAACTTCTCTATCGTCAAACCAATGCTGGTCTACACCGGTATGAT  
 \*\*\*\*\*

BIG-GENOME CGAACAGCTTCAACAGTTGTTCAAACCAAGAAACCGGTCCACATCGAACCAATCAAGAA  
 BIG-ORF CGAACAGCTTCAACAGTTGTTCAAACCAAGAAACCGGTCCACATCGAACCAATCAAGAA  
 BIG-TAIR CGAACAGCTTCAACAGTTGTTCAAACCAAGAAACCGGTCCACATCGAACCAATCAAGAA  
 \*\*\*\*\*

BIG-GENOME AGAAGGTACATCAAGTGGAGTAGAGCTTGAGCCATGGGAGATTGTAATGAAAGAGAAGCT  
 BIG-ORF AGAAGGTACATCAAGTGGAGTAGAGCTTGAGCCATGGGAGATTGTAATGAAAGAGAAGCT  
 BIG-TAIR AGAAGGTACATCAAGTGGAGTAGAGCTTGAGCCATGGGAGATTGTAATGAAAGAGAAGCT  
 \*\*\*\*\*

BIG-GENOME GCTGAATGTGAAAGAAATGATTGGTTTCTCCAAGGAATTGATCTCGTGGCTCGACGAAAT  
 BIG-ORF GCTGAATGTGAAAGAAATGATTGGTTTCTCCAAGGAATTGATCTCGTGGCTCGACGAAAT  
 BIG-TAIR GCTGAATGTGAAAGAAATGATTGGTTTCTCCAAGGAATTGATCTCGTGGCTCGACGAAAT  
 \*\*\*\*\*

BIG-GENOME CAACTCTGCAACTGATCTACAAGAAGCATTGATATTGTCGGCGTTTGGCTGATGTTTT  
 BIG-ORF CAACTCTGCAACTGATCTACAAGAAGCATTGATATTGTCGGCGTTTGGCTGATGTTTT  
 BIG-TAIR CAACTCTGCAACTGATCTACAAGAAGCATTGATATTGTCGGCGTTTGGCTGATGTTTT  
 \*\*\*\*\*

BIG-GENOME GTCTGAAGGAGTTACACAGTGTGATCAGTTTGTGAGATCGGCGATCGATAAAGAT**TGA**  
 BIG-ORF GTCTGAAGGAGTTACACAGTGTGATCAGTTTGTGAGATCGGCGATCGATAAAGAT**TGA**  
 BIG-TAIR GTCTGAAGGAGTTACACAGTGTGATCAGTTTGTGAGATCGGCGATCGATAAAGAT**TGA**  
 \*\*\*\*\*

### 3. Primer pairs used to amplify and sequence through the cDNA of *BIG* gene

Primer S1F: 5'-GGAACATCGTCTTCTCCACAG-3'  
Primer S1R: 5'-TTTGAGCATCTGCCCCCTTG-3'  
Primer S2F: 5'-TTTCTCGCCGTTTACGCTCC-3'  
Primer S2R: 5'-TCTGAAAAAACTGCTCTTGCC-3'  
Primer S3F: 5'-AACCACACTGCTACAGAGGG-3'  
Primer S3R: 5'-GAAAATCAGACAGAGCACGAC-3'  
Primer S4F: 5'-GTAGTATTGAAGACAAGGCT-3'  
Primer S4R: 5'-ATGACTGGTGCTGATGAG-3'  
Primer S5F: 5'-CCCCTCATCCTCCTACATTC-3'  
Primer S5R: 5'-AGTATCTACCCCAAACCTTCTCC-3'  
Primer S6F: 5'-CTGTCAAACTGGATTCCCTG-3'  
Primer S6R: 5'-CATTGCTGCCTCTCTGAAAG-3'  
Primer S7F: 5'-TGCAGTCTCTGAGCATACC-3'  
Primer S7R: 5'-TCCACAGTCACAGAAAAACC-3'  
Primer S8F: 5'-CTTGTGACCTTACTGTGTCC-3'  
Primer S8R: 5'-CTTTCCCGTAACATCCTTTCC-3'  
Primer S9F: 5'-GCTACTCTTTTTGTTGCTTCTC-3'  
Primer S9R: 5'-CATCCATTTTTCTTTCCAGCC-3'  
Primer S10F: 5'-TCTCCAATCCAAACCCTGAC-3'  
Primer S10R: 5'-TGAACCCCTGTATCCTTTCC-3'  
Primer S11F: 5'-CCGTAAATCAAATTTCTCCGTC-3'  
Primer S11R: 5'-TCCATCCATCCACTCAACTC-3'  
Primer S12F: 5'-AGCTTCAACTCCCTCCATC-3'  
Primer S12R: 5'-CTTTTCCTTTTCCCCATTTTC-3'  
Primer S13F: 5'-GCAAAAGCCCATAGAGCAG-3'  
Primer S13R: 5'-TCAAGCAACAAGGAGACAAG-3'  
Primer S14F: 5'-AAATGGGGGAAAAGGAAAAGG-3'  
Primer S14R: 5'-CGGGAGTTTGGATGATTGG-3'  
Primer S15F: 5'-CGAACTCATTGCCAATCATCC-3'  
Primer S15R: 5'-TCATCAAACTCTACGAAGCC-3'  
Primer S16F: 5'-ATTTCGAGCACAAGGACAC-3'  
Primer S16R: 5'-TCCGACCTGATAGATTGAGAAC-3'  
Primer S17F: 5'-TTGGAATGGGAGAAAGGGG-3'  
Primer S17R: 5'-CGGGCAGATCAGATTACAAAG-3'

Primer S18F: 5'-TTTATCCGTGCCTGTGTTTC-3'

Primer S18R: 5'-GTGTTCCCTTTGCTGTTTGTGTTG-3'

Primer S19F: 5'-AAGTGACAGCATCAGTGCC-3'

Primer S19R: 5'-CTTCCTCTACATCCTCAAAACC-3'

Primer S20F: 5'-CCAAAGATGAAATGAGACGCC-3'

Primer S20R: 5'-TTGAAGCTGTTTCGATCATAACC-3'

Primer S21F: 5'-CATCAACTGGAACAGAGGAAAC-3'

Primer S21R: 5'-CGGTGGCTCAATAAACCAAAC-3'

#### 4. The confirmed cDNA of *BIG* gene by PCR and DNA sequencing

```
ggaacatcgtccttctccacagagtcctctttcaccgcctttgattctttacttataaacccttaccttcctcctcc  
ttttgtatatacctatttctctagaaaccttttccctcatcgaactcttcttctttcgcctcgccagaaATGGCAG  
ATGACTTGGCGAATCTCTGCCGATTTCTCTTCGACGACACCGCCTTTCCCTCTTTGTCGCTTCGGCATTCTCAGA  
TCTCTTTTCTCGCCGTTTACGCTCCGATGATTGATCAAGCGCGGTCTCCGTTCTTTCTATCTCCTCCTTCGCTGG  
GGTGTGCTCCGATCGGCGGAGACGATGCTGATTCTCTGGCAAGCTACGCTTTGAGACATGGTCCGATTTCGACGC  
TTCAAGCTCTTGTTCGATATCTCAGGCGATCCTTCTACTATCTCGATCTCTATTAGTGGACCAACTCGAACCAAT  
CGTTTTGGGTGTATCCAGGAGGTGATGGAATTCTCTCTCAGCTTCTTGGAGAAGTCAAGTTTTAGACAAAATGAT  
CTCAAAATGGAGATCAACATGGAAATACTTTTGGAAATGCTTCTTTTGATGGAAGTGAGAAGCAATATGATATAT  
TACCAGATTTCTCTCCCGCTGAAGTTGCAGAACTGTGGCCAGCTTTTTCTGGCGAGCATGATAATATGGACGCACA  
GAGCCTTGTGAAATGTACTTTTCAAGGGGGCAGATGCTCAAATGAAGAGAAGCCAGTTGACCGGCTTCTTATTACA  
CTGATGTCTGAATGCATGAACTGATGTCCAGGCGCAGTCAGTAGTAAAGTCCCCTTTTCAACAAGACTGTGGAG  
ACCTGAATCCCTTTACTCGACACCTGGCAGTTGTTACCTTCGCTGTGTTTGTGCGCTGATTATGGTCTGCAAGA  
GCTTGTCAATTGCCAAATATGTTGGATGAGAAGACGGTTGATCAAGCTGTCTTGATAAAATGTGCTTCTGCTTA  
AGAATTTGAAGCTGCTTGGGAGTCTTTCAAAGATGTTCAAAGTATAGAAAACGACGGCTCATTGTTACAAGCAG  
TAGCTTCATTTACAGATGCTTTTCTAAGCTGTTTAGGGTTTTCTTTGAATTCACTAACCACACTGCTACAGAGGG  
TAATATTGAGAGTCTTTCTCTTGGCGTAGTGGAGGGATTCTTAATCTCGTCCAACCTCATTTTTGGCAAGAGCAGT  
GTTTTTCAGAATGTCCAGGCATGTGTGGCAGCTTCTATTGTGAGCAATCTAGATTCCTCAGTGTGGAGATATGATG  
GGTCTCTTGTAAATTTGACACCTCCACTTGCTTACTTCCCTCGGCTGTGATCTACACATTGAAACTCATTCAAGA  
TCTCAAGAGACAACCATACCATATCCATGATCTGAGGGTTTTAGAGTCTGAAGTTACCTATGAAGATGTCAGTTCC  
ACTGTTGATTTCTGTTTATTTCCATCTGCGCCAGGAAAAGATCCCGTTGCTCAAGTGCTTACGGTTCGAGGATATAA  
TGAGAGTGATATTTCTTCATCAAGTCAATGGATGGATAACTTCTTCCATCTTGTTTATTTCTCCATCGCGAAGG  
TGTAATAATACGACCAAAAGTGGAGAGGACGTATTCCAGTTAAGATCCAACAGTTTTGCGAGAAGTTGAAAGCCAA  
ATTTCTCATGACGATGAAGCCCTGTTTGGAAACTTATTTCTGAGGGTAGTCGTTCTCTGTTCCATAGAACC  
ATGATCAACCACCTGTTTCTGTCAGCAGCAATTTACTATTGCAAGCTGCTAAGGAAGTGTGAATTTTCTTAGAGC  
ATGCATTTCTTGTCAAGAATGGGTTCCCTAGTATATATGAAGATGGATGTAAAAAGCTTGACACTGGTCACATTGAT  
ATCCTGCTCAATATAGTAGGCTGTAGTATTGAAGACAAGGCTTCTGATGGTGGTTGCATGCTCCAAGATGAGGGAA  
GACCTGGACATGTTGCTTTTGGAGCTGTTACTCAATCTCTTGAGAAGTCGTGCTCTGTCTGATTTTTCTAGAGTCTTA  
CCTTTTTAGCAAAATCTTGTGTTGAAAATAGTGACTTCAACTATAATGATAAGACTCTGGCACTGTTGGCTCAC  
ACTCTTCTATGTAGGCCGGGCTTGGCTGGGGCACAGTTGAGAGCCAAAATTTATGATGGTTTCGTTAGTTTTGTTA  
CCGAGAGAGCAAGAGGTATATGTGCTGAAGCTTTGAGTCTCAAGGAGTTGACTGCTTGTCTTCTTCTGCTTTCCA  
TATTGAGATTTCTTATGCTTTCCATTTATCAAATGAAGCTGAGAAGGCAAAATTTCTCAAATCTCATTGCTTCA  
TGTCTGCATAAAGTTGATACCCCGGCAGGAATATGTGATGGTCTCAGCTGTCTCTTGGGCAATGCTGATATCTA
```

GGTTGTTAGTGCTGTTGCACCATATGTTGTTACATCCAAACACATGCCCAACATCATTAAATGCTAGATCTAAGGTC  
TAAACTGAGGGAAGTTCGTAGCTGTGGTAGTAATTTACATGTAAGTGTGGTGATCATTATCTTCGTGGGCGTCT  
CTTGTAGCAAGGGGTATAACTGATTCATGGGCTGAGGATGAGTCAGTCAGCCATCTAATGAGTCAAATGATTGACT  
TTTCCCCTCATCCTCCTACATTTTCCAGAAATGATGTGTCTACTGCCAAAACCTTAAACTTGGATTATGGAGATTATC  
TGCGAGTTTGTGTGCGGTTTTGGGGCTGTGGAAGGGGAAAAGGCAGGAAAAGTGAAGACCTGCTAGTGGAAGA  
TACATTTTCATGCTTTCTCAGATATGCTCGTATTAAGTGTGCATTGGATAGCCAGCCTTCTTTGCATGTTAATT  
ACCAGAATGTGGACATATCTAACTCTGTGGATCTCATCAGCACCAGTCATTTGCTTGTAGGCGACATCAATGTTGT  
TGGTAGAAATATCGAGTTGAGAAACATCTGATCGGTGTTTTAAATCAGCTCCAGGCAGCACCTGAGCAGGTGGTT  
GAGGATTTGGGTTGGGATTATATTCGCGAAGGAGCTTGGCTCTCTCTTCTGTTGTACTTTCTTGATGGTGGCGTCT  
GGGATTATTGCAACAAAATTTCATGTTCCAGAAATCGATCCCTTCTGGAAGGAGTGCACATCTGTTGACGCCAAGTA  
TGTTGCTGCAGCAGAAGGGTAGTCTCTTACTTGATGAAGACTGGTGATATGCAGAATTGCTGAGAATGCTTTCA  
TCATTGGTTGGCAAATATTACGAGTGATAAGAAAGCTTCTCTGCAACTTTCAGCGATTGGAATCATCACGGTC  
ATAGTTCCGCTTCTCTGCTACTTCTCAAGCATACTCAATTTGGTAAAAGTCTCCAAGGTGAATATGCGAAGATTGG  
TGACAAATCTCTCCATCTTCAATGCATCTTTATCTGTCAAAACTGGATTCCCTGGGAGATGGAAGAGGTTCCGGT  
GTTTTATGGAAGTGTGTTGGGAATTTATGGTACATGGGTTTTCCACTAGTCTTCAAACCTTAGTGCGATTCTTC  
TTTCATGTATTCTAAGCATAAGATGCATTGTGCTGACAAATAAATGGCTTACTCAAACCTGGGTAACCTAAGGAGAA  
GTTTGGGGTAGATACTAGTGTACTTTCATCAGCTACTTGTATCTATCATGATTATTAAGTTTGACCAGGTATTCGAA  
AGCTTTCATGGGAAATGTGAGGAGATCCATCAAAATATATGTGCCGTGTTGCAGCTTCCAGATTTGACTGAGTTGT  
TTCTGATGAAAGACATGGAGGGGTTTGTAAAGAGATATCAGTGTGAGCAGATAGATAGAAGCCAAGTCTGAAGG  
GGTGATCACCAAGATTGTAGATGTTATGGACAGTCTAAGCAAGGATTCTTCGAAATCTGATATTTCAAATTTTAT  
CTTGGTGTAGATGCAGTCTCTGAGCATAACCAGGGAATTTATGAGTTGCAACGTGGAGATCTGTCTGTGTTTATTG  
ACTCATTTGGACTACTGTTCCCTTGAACCAGTAAACATAAAAAGTACTTAACTTCCCTTGTGACCTTTTGTCTGTGGC  
TCAATCCCCTGATCTCCGGAGAAGAGTACAACAAAATTTATTGACATGGATTTGATATCTTTGTCTGGGTGGCTG  
GAGAGAAGACTGTTGGGTTCCCTTCGTTGAAGAAATAGATGGGAAAAGACTGCAAAAGGAAATTTCTTCCCTTCA  
GAGAGGACGAATGAATTTTATTAATTTGCTTGTGTCTACTACTAACGACCTACAGACCAGAGAGTTACAGAATCA  
TTTATTCGAGGCCTTGCTGATCTCCCTCGATACCGCGTTTTCTCTCATTGATATCCATATGTCTATGTCATATTTT  
CATTTTGTCTTCAACTTGAAGGAAGACAACCTGATGAAGATGGTTTTAAAGAGAACCATAATGCTGATGGAGA  
AGCTTGTCTCCGAGGAGAAGTTGCTTCTGTTTTGAAGTTTATTTTTGGTGTGATAGGCACCTTGTGAGCAACCG  
TTCTCCAAGTCATGGAGAGAGTTTGTGTGGAAGTCCCTGGCAAGCTATAAGAATACTGCAACAGGTCTTTGGTC  
CCAAAACCTTTCAGGAACAACGAAAAATCTGATACATTTGGCTCTCCCCGTGGATCAGGAAGGAAGCTCAATATCAC  
TTGAATGCGATGTCACTTCTGTTGATGAAGATGAAGATGATGGAACATCTGATGGTGAAGTGGCCAGCTTAGACAA  
GGAAGATGAAGAAGATGCCAACAGTGAGAGGTACCTTGCCTCAAAGTCTGCACTTTTACGTCCAGTGGCAGTAAT  
TTCATGGAAACAACACTGGTATTTTTGTTTACTTGTGACCTTACTGTGTCCAAAGGTTGCTGTTCTGTTTGC CGA  
AAGTTTGCACCGGGTACCGTGTGTCTATTACAGATCGAGTCGGTTTTTCTGTGACTGTGGAGCTGGAGGTGT  
TAGGGGAAGCAGCTGCCAGTGCCTGAAGCCACGCAAATATAATGGAATGGAAGTGTCCAGCTCGTGGTACAAAT  
AATTTCCAATCGTTTTTACCCTTGTCTGAGGATGCAGATCAGCTTGGAGAAAGCGATTCCGATGTGGAAGAAGATG  
GTTTCCGGGAGGAAAATCACGTTGTCTTATATATCCCTAAAGAACTCAATATAAGATGTCACTGCTACTCGAAGA  
GCTCGGGATAGAGGACCGAGTACTGGAGCTTTTCTCATCTTACTTCCGTCTATCACTAGCAAAAGAGACTCTGGC  
CTGTGAAAAGAGAAGCAGGTCAATCTCGGAAAGACAAAGTTCTTTCATTTGACACGGATCTTTTGCAGCTGAAAA  
AAGCATATAAAAGTGGGTCATTGGACTTAAAAATAAAGGCTGATTATACTAATTCAAAGGACCTTAAATCTCTTTT  
AGCCAATGGTTCCCTTGTCAAGTCTCTCTGAGTGTAGTGTTCGGGGTCGCCTTGCAGTTGGAGAAGGTGATAAA  
GTTGCTATATTTGATGTTGGACAGCTAATAGGACAAGCCACAATTGCACCCATAAATGCAGACAAGGCCAACGTTA  
AACCACCTTCAAGGAATATGTTTCGTTTTGAGATTGTGCATCTTTCATTC AACCCAGTTGTGGAGAATTATCTTGC  
TGTCGACAGCCTTGAAGATTGCCAGATACTTACTTTGAATCATCGAGGTGAAGTCATCGACAGGCTTGTCTGTGAG

CTTGCCCTGCAAGGTGCATTCATCAGGCGTATAGACTGGGTTCTGGTTCACAGGTTTCAGTTAATGGTCGTTACGA  
ACAAATTCGTGAAGATTTATGATCTATCCCAGGATAGCATCAGTCCAACACAGTACTTCACTTTGCCAAACGACAT  
GATTGTGGATGCTACTCTTTTTGTTGCTTCTCGTGGGAGGGTTTTCTTCTTGTCTTTTCAGAACAAGGGAATTTG  
TATAGGTTCGAACTATCTTGGGGCGGCAATGCAGGCGCAACACCGCTTAAGGAAATCGTTCAGATTATGGGAAAGG  
ATGTTACGGGAAAGGTTTCATCTGTCTATTTCTCTCCAACATATCGACTGCTTTTCATATCCTATCATGATGGAAG  
TTCTTTTATGGGTCGACTCAGCTCAGATGCAACATCCTTAAGTATGATACATCTGGCATGTTTGGGAAGAATCAGAT  
TGTAACAAAGGGTGGCTGGATTGCATCGTTGGAAAGAGTTGTTGGCTGGCAGTGGATTATTTATTTGCTTCTCCA  
GCGTGAAGTCAAATGCTGTCTTAGCTGTGCTTTGAGGGCGATGGGGTATGTGCACAGAATCTCCGTCATCCGAC  
AGGATCATCTTCCCCTATGGTTGGAATAACCGCATAACAACTTTGTCAAAAGACAATGTTCACTGTCTAGTTCTG  
CATGATGATGGCAGCCTTCAGATTTATTTCTCATGTTCTAGTGGAGTTGATACTGACTCAAATTTTCACAGCTGAAA  
AAGTTAAAAAGTTGGGTTCTAAGATACTTAACAACAAAACCTATGCTGGTGCAAAGCCAGAGTTTCCCCTGGATTT  
CTTTGAGAGGGCATTTCATTACAGCAGATGTGAGACTTGGTAGTGATGCTATTAGAAATGGTGATTCCGAGGGA  
GCAAAACAGAGCTTGGCATCTGAGGATGGCTTTATTGAGAGCCCAGTCCCGTGGGCTTCAAGATATCTGTCTCCA  
ATCCAAACCTGACATTTGTTATGGTTGGCATCCGGATGCATGTGGGTACTACATCAGCAAGCTCTATACCTTCAGA  
AGTGACCATTTTCCAGAGATCGATTAAGATGGATGAGGGCATGAGGTGCTGGTATGACATCCCATTTACTGTGGCT  
GAGTCACTTCTAGCTGATGAAGATGTTGTAATCTCTGTGGGGCCGACTACTAGTGGGACTGCACTGCCAGAAATAG  
ACTCGCTTGAAGTATATGGTCGAGCTAAAGATGAATTTGGCTGGAAAGAAAAATGGATGCTGTGCTAGATATGGA  
AGCTCGTGTGCTTGGTCATGGTTTGCTTCTTCCAGGCTCTAGTAAAAAGAGAGCGTTGGCACAGTCTGCTTCAATG  
GAAGAGCAAGTTATCGCTGATGGTCTTAAGCTCCTATCAATCTATTATTCAGTTTGTAGGCCACGGCAAGAAGTAG  
TGCTTAGCGAACTCAAATGCAAACAGCTACTAGAGACGATTTTCGAAAGTGATAGGGAAACCTTATTACAACGAC  
AGCTTGCCGTGTTTTGCAGTCTGTCTTTCCAAGAAAGGAGATATACTACCAGGTCAAAGACACCATGCGACTCCTT  
GGAGTGGTCAAGGTGACCTCCATTTCTTCTCGAGGTTGGGGATTTTGGTACTGGAGGTTTCGATTGTTGAAGAGT  
TCAATGCTCAGATGCGGGCGGTGTCTAAAGTAGCTTTGACCCGTAAATCAAATTTCTCCGCTTTTCTGGAGATGAA  
TGGCTCTGAAGTGGTTGATAATCTGATGCAAGTGCTATGGGAATTTTGGAGTCAGAGCCACTCGACACACCTACT  
ATGAACAATGTCGTGATGCTCCTCCGTTGAACTAATCTATAGCTATGCAGAGTGTGGTGGCATCTCAAGGAAAGGATA  
CAGGGGTTCAATCTGTAGCTCCTGCAGTTCAGTTACTGAAAGCACTTATGTTGTTTTCCAATGAGTCTGTGCAAAC  
ATCCAGCAGCCTAGCTATATCATCAAGGTTACTTCAGGTTCCCTTTCCCAAAGCAAACAATGTTGACAACAGATGAT  
TTGGTTGACAATGTTACAACCTCCTCCGGTGCCTATCAGAACAGCTGGTGGAAATACACATGTCATGATTGAGGAGG  
ACTCTATAACTTCATCTGTTCAACTGCTGTGATGGCTGCTCCACCGTCCCTATACCTGAGAAGAAGGTGGCACTG  
CACTGTTTGTCCAGATTTTGATCTATGTGAGGCATGCTATGAAGTGTAGATGCAGATCGTCTACCACCACCACAC  
ACTCGAGATCATCCTATGACAGCAATTCCAATAGAAGTGAATCACTTGGTGCAGACACCAATGAGATTCAGTTCT  
CTGCGGATGAAGTAGGTATTTCAAATATGTTGCCGGTGGTAACCAGTAGCATTCCACAAGCTTCAACTCCCTCCAT  
CCATGTCTTGAACCTGGTGAATCTGCTGAGTTCTCTGCCTCACTGACCGATCCTATTTCTATCTCAGCGTCAAAG  
CGTGCCGTAAATTTGATTCTCTCTGAGTTTCTCCAAGAGTTGAGTGGATGGATGGAAACAGTATCCGGTGTTC  
AAGCTATTCCTGTGATGCAATTGTTCTACAGATTATCATCTGCCATTGGTGGAGCCTTTATGGATAGCTCAAAGCC  
CGAAGAAATAAGCTTGATAAGTTAATTAATGGCTTTTGGGTGAAATCAATCTCAGCAAGCCGTTTGTGCTTCA  
ACTCGCTCTTCTTAGGGGAAATTTGATTTCTTGTGTTTATGTTTTTTCACCTTGATGCTTCGGAGTTGGCACCAGC  
CTGGTAGTGATGGTAGTAGCTCAAATTAGGTGGAAGTACAGATGTACATGACCGGAGGATTGTCCAGAGCTCCAC  
TGTAGTAGCTACTCAGTCTTCTTTACATGTTCAAGAGAGAGATGACTTGCATCTCAGCTAGTTCTGTCGTCAGT  
TGCCCTCAGGAACCAAGAGTTTGTAAATATCTGATGAACATACTTCAACAGCTAGTGCATGTTTTTAAAGTACAGTG  
CTGCCAATGTTGAAGCTCGTGGATCAAGCTCTGGTCTGGTTGTGGAGCCATGCTCACAGTCAGAAGAGATTTACC  
TGCGGGTAACTATTCTCCCTTCTTTTCCGATTATATGCAAAAGCCCATAGAGCAGATATTTTTGTGGACTATCAC  
AGGCTGCTACTTGAGAAATGTGTTTCGCTTAGTATATACCTTAGTTAGACCTGAAAAACAAGAGAAAATGGGGGAAA  
AGGAAAAGGTATACAGGAATGCTTCTTCAAAGATTTAAAGCTGGACGGTTTCCAGGATGTTCTATGCAGCTATAT

AAATAACCCTCATACGGCTTTTGTAGGAGATATGCTAGAAAGGCTGTTTTTGCATCTTTCGCGGAAGCAAAACTCAA  
TACTACAGTGTGAGAGATTCATGGCAGTTTTCCAATGAAGTGAAAAACCTATACAAGCATGTTGAAAAGTCTGGTG  
GTTTTGAAAAAATGTTTCATATGAAAGAAGTGTAAGATTGTGAAGTCGCTTCTACAATGCTGAAGTTGCTGT  
GGCAAGACCTCGGAAGTGGCAGAAGTACTGTCTCAGGCATGGAGATTTTTCTGTCTTCCCTACTGAATGGTGTATTC  
CATTTTTGCGGAAGAGTCTGTAATCCAGACACTTAAACTCCTCAATTTGGCCTTTTATCAAGGAAAAGATGTGAGCA  
GCTCAGTGCAGAAAGCTGAAGCAACTGAAGTAGTGACAGGCTCAAACCGGTCAGGATCTCAGTCAAGTGGATTCAAA  
AAAGAAGAAAAAAGGTGAAGATGGGCATGATTCGGGTTTGGAAAAATTATATGTGGATATGGAAGGGGTGGTCGAT  
ATCTTCAGTGCCAATTGCGGAGATCTCTGAGGCAGTTTATTGATTTCTTCTGTCTGGAATGGAATTCGAGCTCTG  
TTCCGACTGAAGCAAAATCTGTTATTTATGGCTTGTGGCATCATGGAAGACACTCGTTCAAAAGAAAGTCTGTAGC  
AGCTCTTTTGCAGAAGTTAGATACCTGCCAGCATATGGTCAGAATATTGTTGAGTACACAGAAGTGTCTCCTTG  
TTGCTTGACAAGGCTCCAGAAAAAACAACCTCAAAGCAAGCAATTAATGAGCTTGTGGATCGGTGCCTGAACCTGATG  
TGATAAGGTGCTTTTTTGGAGACGCTGCATTCACAGAACGAACTCATTGCCAATCATCCAAACTCCCGTATATACAG  
CACTCTGGGTAATCTTGTGGAATTTGATGGTTATTATCTTGAGAGCGAACCTTGTGTTGCCATGAGTTCTCCTGAT  
GTGCCATATAGCAAAATGAAGCTTGAAGTTTGAATCCGAGACAAAGTTACTGATAACCGCATCATTGTGAAAT  
GTACTGGGAGTTATACGATACAGTCTGTGACAATGAATGTTTCATGATGCACGAAAGTCAAAGTCGGTGAAGTCTC  
AAACTTGTATTACAACAATCGCCCTGTCTCGGATTTATCAGAGCTTAAAAACAACCTGGTCACTGTGGAAGCGTGCC  
AAAAGTTGTCATCTGTCTTTTAAACCAAACTGAACTGAAGGTGGAATTTCTATTCTATTACTGCTTGTAACTTCA  
TGATCGAGTTGGATTCTTCTATGAGAATCTTCAGGCCTTATCTTGAACCATTGCAATGTCCTCGATGCAGCCG  
ACCTGTCAGTATAACATGGTATTTGCAGCAACTGCCATGAGAATGCTTATCAGTGCAGGCAATGCCGTAACATT  
AATTATGAAAATTTGGATTCAATCCTTTGCAACGAGTGTGGCTACAGCAAGTATGGGAGTTTGGATTAACTTCA  
TGGCAAAACCAAGCTTCATATTTGATAATATGGAAAATGACGAAGATATGAAGAAGGGATTGGCTGCTATAGAGTC  
TGAGTCTGAAAACGCTCACAAGAGATATCAGCAACTACTGGGATTCAAGAAGCCGCTTCTGAAGATAGTTTCAAGC  
ATTGGTGAACCTGAAATGGATTTCGCAGCACAAGGACACTGTCCAGCAAATGATGGCATCTTTACCTGGTCCATCAT  
GCAAGATAAACCGCAAAATCGCACTTTTGGGCGTACTGTATGGTGAGAAGTGCAAAGCTGCTTTTGTATCTGTGAG  
CAAAAGTGTACAAACACTGCAGGGGCTTCGTAGAGTTTTGATGAGCTACCTCCATCAGAAAAATTCAAATTTTTCA  
TCAGGTGCCTCAAGATGTGTGGTCTCAAAGACCCCAACAATTTGTTATGGTTGTGCAACTACATTTGTCACTCAAT  
GTCTTGAGATTCTTCAAGTGTGTGCAAGCATCCAAGATCTAGAAAACAACCTGTTGCAAGTGGTATTTTGTCTGA  
GTTGTTTGAACAATATTCACCAAGGTCCGAAAACAGCCCGTGTCAAGCTAGAGCAGCTCTTTCTACTTTCTCG  
GAGGGTGTCTGAGTGCAGTGAATGAGTTAAACAATCTGGTACAGAAGAAAATAATGTACTGCCTTGAACACCATC  
GTTCCATGGATATTGCGCTCGCCACTCGTGAGGAAATGTTGTTGCTTTCAGAAGTTTGCTCTCTCACTGATGAATT  
CTGGGAGTCAAGACTGCGCCTTGTTTTTTCACTACTATTTTTCATCCATTAATTTGGGTGCTAAACATCCTGCTATA  
TCAGAGCACATAATTTCTCCTTGCCTTAAGATTATTTCTGTGGCATGTACACCTCAAAACAGATACGGCAGAGA  
AAGAGCAAACGATGGGAAAATCTGCTCCTGCAGTGAAGAAAAGGATGAGAATGCTGCTGGCGTCATAAAGTATTC  
ATCAGAAAGCGAAGAAAATAACCTGAATGTATCTCAGAAGACGCGAGATATTCAGCTTGTGAGTTATTTGGAATGG  
GAGAAAGGGGCATCATATCTCGACTTTGTGAGGAGGCAATACAAAGCCTCTCAGTCAATTAGAGGTGCGAGCCAAA  
AGTCTAGAACCACAGATCAGATTTCTTGGCACTTAAATATACACTTAGGTGGAAGCGACGGTCTAGCAGGACATC  
TAAAGTGGTTTACAGGCATTTGAGCTCGGGTCGTGGGTACAGAGCTTATCTTAGTGCATGTTCTCAATCTATC  
AGGTGCGAGATGTGCACATTGATTAGTTTACTCGCTGCCAAAAGCTCACCTAGGCGCTACAGGCTGATTAATTTGC  
TGATAGGCTTGCTTCCCGCTACGCTTGCAGCGGGTGAAGTAGCGAGAATACTTTGAGCTACTCTTCAAAATGAT  
TGAGACACAAGATGCACTTCTTTTTCTTAACTGTCCGGGTTGTCTGACAACAATCTGTAATTTGATCTCCCAAGAG  
GTGGGAAACATTGAATCTCTAGAAAGGAGTCTTCAAGATTGACATTTACAGGGATTTACCTCCACAAGCTCTTAG  
AACTCCTTGGAAAGTTCTTAGAGGTTCCAAATATTCGTTCCAGATTCATGAGAGACAATTTACTGTCTCATGTTCT  
GGAGGCCCTCATTGTAATTCGTGGCTTGATAGTGCAAAAGACAAAGCTTATAAATGATTGCAACAGACGCCTAAAA  
GATCTTCTTGACGGACTTCTGCTTGAAGCAGTGAAAATAAACGTCAATTTATCCGTGCCTGTGTTTCTGGACTGC



AAACCCATGCAGAGGAGAAACAAAGGACGTACCTGTTTGTATTCTTGAGCAACTTTGTAATCTGATCTGCCCGTC  
AAAACCTGAGGCTGTGTATATGCTGATCTTGAACAAATCACACACGCAAGAGGAGTTTATCCGGGGATCAATGACA  
AAAAATCCATATTCGAGTGCTGAGATTGGCCCACTGATGCGGGATGTGAAAAACAAGATTTGTCAGCAGTTGGACC  
TGCTAGGTCTACTGGAAGATGACTATGGCATGGAGTTGCTTGTAGCAGGAAACATCATTCTACTAGACCTGAGCAT  
AGCTCAAGTTTATGAGCTAGTTTGAAGAAATCAAATCAGTCTTCTACTTCACTGACCAACTCCGCACGTGTAGCT  
TCAAATGCAGCTCCCAGCAGGGATTGCCCTCCCATGACGGTGACATACAGACTTCAGGGGTTAGATGGTGAAGCTA  
CTGAGCCTATGATCAAGGAATTGGAAGAAGATAGAGAAGAATCACAAGATCCAGAGATTGAGTTTGAATAGCAGG  
TGCAGTTGAGAAATATGGTGGTCTGGAAATTTTACTTGTATGATCAAGAGTTTACAAGATGACTTCAAATCCAAC  
CAAGAAGAGATGGTTGCAGTTCTTGATCTCCTAAACCATTGCTGCAAGATTAGAGAGAACAGGCGAGCTCTACTCA  
GGCTAGGGGCTTTAAGCTTACTTCTTGAACAGCTAGGAGGGCATTCTTCTGTGGATGCTATGGAGCCAGCTGAAGG  
CATACTCTTAATTGTCGAGAGTTTGACGCTTGAAGCAAATGAAAGTGACAGCATCAGTGCCGCACAAAGTGCCTTTG  
ACTGTCAGTAACGAGGAACTGGAACCTGGGAACAGGCCAAAAAATAGTGCTTATGTTCTTAGAAAGGCTAAGCC  
ATCCTTCAGGGCTTAAAAAGTCAAACAAACAGCAAAGGAACACGGAGATGGTTGCTAGAATCTTACCTTACTTAAAC  
ATACGGTGAGCCTGCAGCGATGGAAGCACTCATAGAGCATTTTAGCCCTTACCTGCAAAACTGGTCTGAATTTGAT  
CAGCTTCAGCAACGTCATGAGGAGGACCCCAAGGATGACAGCATTGCTCAGCAAGCGGCGAAGCAGAGGTTTACTG  
TGGAGAATTTTGTAAAGAGTGTGAGAATCTCTCAAGACAAGTTCATGTGGAGAGAGGTTAAAGACATAGTTTGGGA  
GAATGGTATCATAGCTGTGCTGTCAAACACATAAAGGAAATTTTGTCAATCACGGGACAGACTGGGTTCAAATCT  
AGCAAGGAATGGCTTTTGGCTCTTAAACTTCCGTCAGTGCCCTTATTTTGTCAATGCTAAGAGGATTGTCGATGG  
GTCATTTGCCTACCCAAACATGCATAGACGAGGGAGGAATTTTAAACCCTACTTCATGCCTTAGAAGGAGTCTCTGG  
AGAAAACGACATCGGTGCAAGGGCTGAAAATTTGCTAGATACACTTGCCGATAAAGAAGGAAAAGGAGATGGATTT  
CTTGGAGAGAAAGTCCGTGCATTACGAGATGCCACCAAGATGAAATGAGACGCCGTGCATTAAGAAAGAGAGAGG  
AGCTCCTGCAGGGACTTGAATGCGTCAAGAGCTATCTTCTGATGGTGGTGAAGGATTGTGGTTTCTCAACCAAT  
TCTTGAAGGTTTTGAGGATGTAGAGGAAGAAGAAGATGGATTGGCTTGCATGGTGTGTAGAGAAGGCTACAAGCTC  
AGACCTTCTGATTTATTAGGAGTCTACTCTTACAGCAAACGGGTGAATCTCGGTGTTGGCAATTTGGAAGCGCAC  
GTGGTGAATGCGTTTACTACTACAGTGAGCTACTTCAACATAATTCATTTTCAATGTCATCAAGAGGCAAAAAGAGC  
CGACGCTGCTCTTAAAAATCCGAAGAAAGAATGGGAAGGAGCTATGTTGCGTAACAATGAATCTCTTTGCAACTCT  
CTCTTCCCTGTCAAGGGTCCCTCAGTTCCTTAGCACAGTATCTTTCGTTACGTTGACCAGTACTGGGATAATCTCA  
ATGCTCTTGGTGCAGCCGACGGAAGCAGACTCCGCTCTATTGACGTACGACATTGTCCTGATGCTGGCTCGGTTTGC  
AACAGGAGCTTCTTTTAGCGCGGATTGCCGAGGTGGAGGAAGAGATAGCAATTCCTGTTTCTTGCCTTTCATGTTT  
CAAATGGCCCGTCATCTTCTCGACCAAGGAGGCCCGTCAACGCACAAACATGGCTAGATCTGTTTTCATCGTACA  
TTTCATCATCATCGACATCTACAGCAACAGCGCCATCTCGGACTCGCGACCTTTAACTCTGGATCCCAGCTATC  
ATCAACTGGAACAGAGGAAACGGTTCAGTTCATGATGGTAAACTCGCTTCTATCAGAATCATATGAATCATGGCTC  
CAACACCGTAGGGTCTTCTCCAGCGGGGATTTACCATACTTTCATGCAACACGCTCACGGTTCGGGTAGCTTCTC  
GCGCTGCAGAACCAACCAGTTCAGGAGGCAAAACCAAGACGCAGAAACCTTAAACGGCGATGAACTTCTCTCTAT  
CGTCAAACCAATGCTGGTCTACACCGGTATGATCGAACAGCTTCAACAGTTGTTCAAACCCAAAGAAACCGGTCCAC  
ATCGAACCAATCAAGAAAGAAGGTACATCAAGTGGAGTAGAGCTTGAGCCATGGGAGATTGTAATGAAAGAGAAGC  
TGCTGAATGTGAAAGAAATGATTGGTTTCTCCAAGGAATGATCTCGTGGCTCGACGAAATCAACTCTGCAACTGA  
TCTACAAGAAGCATTGATATTGTCGGCGTTTTGGCTGATGTTTTGTCTGAAGGAGTTACACAGTGTGATCAGTTT  
GTGAGATCGGCGATCGATAAAGATTGAtttcgggaacaaggaagagctttatgtgttttatTTTTGGCAATGTGTC  
tcttgttattaatatttgtgattgattgtaatttagaaaattgtcgttgttgaacattgagacactctgttttg  
ttgtgttattaatgcaaaagcacacacatatattgctctttgtttaaactcgcagcacaacaactcgcacgatcgagt  
cttcggtttgaaaatttccacatttgggttttggtatcatggtataacattttatgcaaatgtgtagattcggattg  
gatttagtgacaggttcgaattttaatcatcaaaaatataagtttggtttattgagccaccg
